**TITLE:**

*PERPETUAL FLOWERING2* coordinates the vernalization response and perennial flowering in *Arabis alpina*

**AUTHORS:**

Ana Lazaro<sup>1, 2</sup>, Yanhao Zhou<sup>1, 2, 3</sup>, Miriam Giesguth<sup>1, 2, 3</sup>, Kashif Nawaz<sup>2, 4</sup>, Sara Bergonzi<sup>2</sup>, Ales Pecinka<sup>2, 4</sup>, George Coupland<sup>2</sup>, Maria C. Albani<sup>1, 2, 3</sup>

**AUTHOR CONTACT INFORMATION**

Ana Lazaro: lazaro@mpipz.mpg.de

Yanhao Zhou: yzhou@mpipz.mpg.de

Miriam Giesguth: Miriam.Giesguth@gmx.de

Kashif Nawaz: nawaz@mpipz.mpg.de

Sara Bergonzi: bergonzi.sara@gmail.com

Ales Pecinka: pecinka@ueb.cas.cz

George Coupland: coupland@mpipz.mpg.de

Maria C. Albani (Corresponding Author): malbani@uni-koeln.de, albani@mpipz.mpg.de, 0049 221 5062 380

**INSTITUTIONS:**

<sup>1</sup> Botanical Institute, Cologne Biocenter, University of Cologne, Zùlpicher Str. 47B, 50674 Cologne, Germany;

<sup>2</sup> Max Planck Institute for Plant Breeding Research, Carl-von-Linné-Weg 10, 50829 Cologne, Germany;

<sup>3</sup> Cluster of Excellence on Plant Sciences "From Complex Traits towards Synthetic Modules", 40225 Düsseldorf, Germany;

<sup>4</sup> Institute of Experimental Botany, Centre of the Region Haná for Biotechnological and Agricultural Research, Šlechtitelů 31, 77900 Olomouc, Czech Republic

**WORD COUNT:** 6728

**NUMBER OF FIGURES:** 6. Color in print: 4 (Figures 1, 2, 3 and 5)

**SUPPLEMENTARY DATA:** 5 FIGURES, 3 TABLES, 3 DATASETS

1 **TITLE**

2 *PERPETUAL FLOWERING2* coordinates the vernalization response and perennial flowering in  
3 *Arabis alpina*

4

5

6 **RUNNING TITLE**

7 *PEP2* coordinates flowering in response to vernalization

8

9 **HIGHLIGHT**

10 The *Arabis alpina* *APETALA2* orthologue, *PERPETUAL FLOWERING2*, regulates the age-  
11 dependent response to vernalization and it is required to facilitate the activation of the *A.*  
12 *alpina* *FLOWERING LOCUS C* after vernalization.

13

14 **ABSTRACT**

15 The floral repressor *APETALA2* (*AP2*) in *Arabidopsis* regulates flowering through the age  
16 pathway. The *AP2* orthologue in the alpine perennial *Arabis alpina*, *PERPETUAL FLOWERING*  
17 *2* (*PEP2*), was previously reported to regulate flowering through the vernalization pathway by  
18 enhancing the expression of another floral repressor *PERPETUAL FLOWERING 1* (*PEP1*), the  
19 orthologue of *Arabidopsis* *FLOWERING LOCUS C* (*FLC*). However, *PEP2* also regulates flowering  
20 independently of *PEP1*. To characterize the function of *PEP2* we analyzed the transcriptomes  
21 of *pep2* and *pep1* mutants. The majority of differentially expressed genes were detected  
22 between *pep2* and the wild type or between *pep2* and *pep1*, highlighting the importance of  
23 the *PEP2* role that is independent of *PEP1*. Here we demonstrate that *PEP2* prevents the  
24 upregulation of the *A. alpina* floral meristem identity genes *FRUITFUL* (*AaFUL*), *LEAFY* (*AaLFY*)  
25 and *APETALA1* (*AaAP1*) which ensure floral commitment during vernalization. Young *pep2*  
26 seedlings respond to vernalization, suggesting that *PEP2* regulates the age-dependent  
27 response to vernalization independently of *PEP1*. The major role of *PEP2* through the *PEP1*-  
28 dependent pathway takes place after vernalization, when it facilitates *PEP1* activation both in

29 the main shoot apex and in the axillary branches. These multiple roles of *PEP2* in vernalization  
30 response contribute to the *A. alpina* life-cycle.

31

32 **KEY WORDS:** *APETALA2*, *AP2*, juvenility, *FLOWERING LOCUS C*, *FLC*, perennial, *PERPETUAL*  
33 *FLOWERING 1*, *PEP1*, *PEP2*, vernalization

34

35 **ABBREVIATIONS:**

36 DAG: Days after germination

37 LDs: Long days

38 SDs: Short days

39

40 **INTRODUCTION**

41 Plant adaptation to environment requires the modification of developmental traits, among  
42 which flowering time is key to ensure successful production of offspring. Alpine habitats in  
43 which juvenile survival is very low are mainly dominated by perennial species (Billings and  
44 Mooney, 1968). In general, the perennial growth habit relies on the differential behavior of  
45 meristems on the same plant so that some will stay vegetative whereas others will initiate  
46 flowering (Amasino, 2009; Lazaro *et al.*, 2018). The main environmental cue that promotes  
47 flowering in alpine species is the exposure to prolonged cold, a process called vernalization.  
48 Alpine environments are characterized by short growing seasons and long periods of snow  
49 coverage. Thus, to ensure reproductive success, alpine plants initiate flower buds in response  
50 to prolonged cold several months or years before anthesis (Diggle, 1997; Meloche and Diggle,  
51 2001). However, exposure to long periods of cold does not always result in flowering. This is  
52 especially true for perennial species, as most of them have a prolonged juvenile phase and are  
53 not competent to flower at a young age (Bergonzi and Albani, 2011).

54 The molecular mechanisms regulating flowering in response to vernalization or to the age of  
55 the plant have been mainly studied in the annual model plant *Arabidopsis thaliana*. The MADS

56 box transcription factor FLOWERING LOCUS C (FLC) is the major regulator of flowering in  
57 response to vernalization (Michaels and Amasino, 1999; Sheldon *et al.*, 2000). FLC  
58 transcriptionally regulates floral integrator genes such as *SUPPRESSOR OF OVEREXPRESSION*  
59 *OF CONSTANS1* (*SOC1*), and genes involved in the age pathway, suggesting an interplay  
60 between these two pathways (Deng *et al.*, 2011; Mateos *et al.*, 2017). Comparative studies  
61 between *Arabidopsis* and the alpine perennial *Arabis alpina* demonstrated that the *FLC*  
62 orthologue in *A. alpina*, *PERPETUAL FLOWERING1* (*PEP1*), also regulates flowering in response  
63 to vernalization. In addition, *PEP1* contributes to the perennial growth habit by repressing  
64 flowering in a subset of axillary meristems after vernalization (Lazaro *et al.*, 2018; Wang *et al.*,  
65 2009). Flower buds in *A. alpina* are formed during prolonged exposure to vernalizing  
66 conditions. The length of vernalization determines *PEP1* reactivation in the inflorescence.  
67 After insufficient vernalization, *PEP1* mRNA is reactivated and results in the appearance of  
68 floral reversion phenotypes such as bracts and vegetative inflorescence branches (Lazaro *et*  
69 *al.*, 2018). In the axillary branches, the length of vernalization does not influence *PEP1*  
70 expression and *PEP1* transcript rises irrespective of the length of vernalization (Lazaro *et al.*,  
71 2018). The fate of these axillary branches is determined by a combined action of the age  
72 pathway and *PEP1* (Park *et al.*, 2017; Wang *et al.*, 2011).

73 In *Arabidopsis*, the age pathway is regulated by two microRNAs and their targets. MicroRNA  
74 156 (miR156) prevents flowering at a young age and gradually decreases as the plant gets  
75 older. miR172 follows the opposite pattern and gradually accumulates during development  
76 (Wu *et al.*, 2009). miR156 transcriptionally regulates a family of transcription factors named  
77 SQUAMOSA PROMOTER BINDING PROTEIN-LIKE (SPLs) (Schwab *et al.*, 2005; Wu *et al.*, 2009;  
78 Wu and Poethig, 2006; Xu *et al.*, 2016). From these, SPL9 and SPL15 have been reported to  
79 activate the transcription of *miRNA172b*, which in turn represses the expression of a small  
80 subfamily of APETALA2-like transcription factors by a translational mechanism (Aukerman and  
81 Sakai, 2003; Chen, 2004; Hyun *et al.*, 2016; Mathieu *et al.*, 2009; Wu *et al.*, 2009). This  
82 subfamily includes six members: AP2, TARGET OF EARLY ACTIVATION TAGGED1 to 3 (TOE1-  
83 3), SCHLAFMUTZE (SMZ), and SCHNARCHZAPFEN (SNZ) (Aukerman and Sakai, 2003; Mathieu  
84 *et al.*, 2009; Schmid *et al.*, 2003; Yant *et al.*, 2010). *A. alpina* has a very distinct juvenile phase  
85 and the accession Pajares requires at least five weeks growth in long days before it is able to  
86 flower in response to vernalization (Bergonzi *et al.*, 2013a; Wang *et al.*, 2011). The role of  
87 miR156 is conserved in *A. alpina* as *miR156b* overexpressing lines block flowering in response

88 to vernalization, while mimicry lines (MIM156), used to reduce miRNA activity, flower when  
89 vernalized at the age of three weeks (Bergonzi *et al.*, 2013a). However, the complementary  
90 expression patterns of miR156 and miR172 are uncoupled in *A. alpina* (Bergonzi *et al.*, 2013a).  
91 Only the accumulation of miR156 is reduced in the shoot apex as the plants get older. At this  
92 stage miR172 is not detected in the shoot apex, although plants acquire competence to flower  
93 (Bergonzi *et al.*, 2013a). For flowering to occur and to observe an increase in miR172 levels in  
94 the shoot apex, exposure to vernalization is required (Bergonzi *et al.*, 2013a). However,  
95 vernalization is only effective in mature plants but not in juvenile plants that express still high  
96 levels of miR156 (Bergonzi *et al.*, 2013a). The initiation of flowering during cold in mature  
97 plants correlates with the gradual increase in expression of the floral organ identity genes  
98 *LEAFY* (*AaLFY*), *FRUITFUL* (*AaFUL*) and *APETALA1* (*AaAP1*) (Lazaro *et al.*, 2018). In perennials,  
99 such as apple and poplar the homologues of the floral repressor *TERMINAL FLOWER1* (*TFL1*)  
100 regulate the juvenile period. Transgenic *Malus domestica* and *Populus trichocarpa* lines with  
101 reduced *TFL1* activity have a shortened juvenile phase (Kotoda *et al.*, 2006; Mohamed *et al.*,  
102 2010). Similarly, the silencing of *TFL1* in *A. alpina* allows flowering in young vernalized  
103 seedlings (Wang *et al.*, 2011). Interestingly, these lines can flower after being vernalized for a  
104 short time (6 instead of 12 weeks). These results suggest again an interplay between the age  
105 and the vernalization pathways.

106 In *Arabidopsis*, *AP2* influences a variety of developmental processes, including flowering time  
107 through the age pathway and floral development (Yant *et al.*, 2010). Strong *AP2* mutant  
108 alleles, such as *ap2-12*, flower early in both long days and short days (Yant *et al.*, 2010).  
109 Similarly, the *A. alpina* orthologue of *AP2*, *PEP2* has been reported to have a flowering time  
110 phenotype (Bergonzi *et al.*, 2013a). *pep2* mutants flower without vernalization and show  
111 compromised perennial traits, similar to *pep1-1* mutant plants (Bergonzi *et al.*, 2013a; Wang  
112 *et al.*, 2009). The effect of *PEP2* on flowering was first related to the vernalization pathway as  
113 it promotes the expression of *PEP1* (Bergonzi *et al.*, 2013a). In 2-week-old *pep2-1* seedlings,  
114 *PEP1* transcript levels are reduced compared to wild type plants (Bergonzi *et al.*, 2013a).  
115 However, *PEP2* also has a *PEP1*-independent role in the regulation of flowering time in *A.*  
116 *alpina* as flowering is accelerated in the *pep1-1 pep2-1* double mutant compared to the single  
117 mutants (Bergonzi *et al.*, 2013a).

118 Here, we show that during vernalization *PEP2* represses the expression of the floral meristem  
119 identity genes *AaFUL*, *AaLFY* and *AaAP1*. Vernalization accelerates flowering in young *pep2-1*

120 plants, indicating that *PEP2* regulates the age-dependent response to vernalization. In  
121 addition, we report that the *PEP1*-dependent role of *PEP2* takes place after vernalization  
122 because *PEP2* is required to activate *PEP1* after the return to warm temperatures. The  
123 involvement of *PEP2* in two different aspects of the vernalization response contribute to the  
124 perennial life-cycle of *A. alpina*.

125

## 126 RESULTS

### 127 ***PEP2* influences the expression of genes involved in many plant physiological and** 128 **developmental responses including flowering**

129 To provide an overview of the role of *PEP2* in *A. alpina* we performed an RNAseq analysis. We  
130 compared the transcriptomes of apices of 3-week-old *pep2-1* and *pep1-1* mutants to the wild  
131 type (Pajares). Three-week old wild type and mutant plants are vegetative and have not  
132 undergone the transition to flowering (Bergonzi *et al.*, 2013a; Lazaro *et al.*, 2018; Park *et al.*,  
133 2017; Wang *et al.*, 2011). Among transcriptomes, the majority of differentially expressed  
134 genes were detected in *pep2-1*. A total of 253 genes were up-regulated and 223 genes were  
135 down-regulated in *pep2-1* compared to the wild type (Fig. 1A, B; Dataset 1). In contrast, only  
136 47 genes were up-regulated and 98 genes were down-regulated in *pep1-1* compared to the  
137 wild type (Fig. 1A, B; Dataset 2). The genes differentially expressed between *pep1-1* and the  
138 wild type are influenced by *PEP1*, whereas the ones differentially expressed between *pep2-1*  
139 and the wild type are affected by *PEP2* both through the *PEP1*-dependent and *PEP1*-  
140 independent pathway. To identify genes influenced by *PEP2* through the *PEP1*-independent  
141 pathway we compared the transcriptomes of *pep2-1* vs *pep1-1* (Fig. 1C, D; Dataset 3). A total  
142 of 504 genes were significantly up- and 251 genes significantly down-regulated in *pep2-1*  
143 compared to *pep1-1* (Fig. 1C, D). Interestingly, the number of differentially expressed genes  
144 detected between *pep2-1* and *pep1-1* was higher than the ones detected when single mutants  
145 were compared to the wild type. Gene Ontology (GO) analysis demonstrated that the most  
146 enriched category for the up regulated genes in *pep2-1* compared to the wild type and in *pep2-1*  
147 compared to *pep1-1* was the biosynthesis of glucosinolates, which are involved in defense  
148 against herbivore attack and pathogens (Fig. S1) (Keith and Mitchell-Olds, 2017). The overlap  
149 in overrepresented GO categories in the set of genes up-regulated in *pep2-1* in comparison to  
150 either the wild type or the *pep1-1* mutant was very high, which is to be expected as more

151 genes were up-regulated in *pep2-1* compared to the wild type than in *pep1-1* compared to the  
152 wild type (Fig. 1A and Fig. S1A, B). Among the commonly enriched categories for down-  
153 regulated genes in *pep2-1*, we found apoptosis and protein desumoylation (Fig. S1C, D).

154 Floral activators and repressors were identified among the differentially expressed genes in  
155 *pep2-1*. For example, the *A. alpina* orthologue of *SOC1* (*AaSOC1*) was up-regulated in *pep2-1*  
156 compared to the wild type (Fig. 1E and Dataset 1). This effect of *PEP2* on *AaSOC1* is through  
157 *PEP1* as *AaSOC1* was differentially expressed between *pep1-1* and the wild type, but not in  
158 *pep2-1 vs pep1-1* (Fig. 1F, G and Dataset 2 and 3; Mateos et al, 2017). The regulation of *AaSMZ*  
159 by *PEP2* is different than by *PEP1*. *AaSMZ* was up-regulated in *pep2-1* compared to the wild  
160 type and down-regulated in *pep1-1* compared to the wild type (Fig. 1E, F and Dataset 1 and  
161 2). In contrast, *AaSPL15* was up-regulated in the *pep1-1* mutant compared to the wild type  
162 and not in *pep2-1* compared to the wild type, indicating that *PEP2* does not control *AaSPL15*  
163 expression (Fig. 1E, F and Dataset 1 and 2). Among the flowering time genes involved in the  
164 *PEP1*-independent role of *PEP2* were the floral repressor *AaTFL1* and *AGAMOUS-LIKE 19*  
165 (*AaAGL19*). *AaTFL1* was down-regulated when we compared *pep2-1* to both the wild type and  
166 *pep1-1*, suggesting that the effect of *PEP2* on *AaTFL1* is independent of *PEP1* (Fig. 1E-G and  
167 Dataset 1-3). Similarly, *AGAMOUS-LIKE 19* (*AaAGL19*) transcripts were down-regulated  
168 specifically in the *pep2-1* mutant (Fig. 1E-G and Dataset 1-3). We also found the SUMO  
169 protease *AaULP1c* and the orthologue of *CIS-CINNAMIC ACID-ENHANCED 1* (*AaZCE1*) being  
170 differentially expressed specifically in *pep2-1* (Fig. 1C-E and Dataset 1 and 2). Interestingly,  
171 both *ULP1c* and *ZCE1* in Arabidopsis regulate flowering through *FLC*. Mutations in this  
172 desumoylating enzyme *ULP1c* and its homolog, *ULP1d*, show an early flowering phenotype in  
173 Arabidopsis that can at least partially be due to *FLC* down regulation (Castro *et al.*, 2016; Conti  
174 *et al.*, 2008). *ZCE1* is involved in the regulation of plant growth and development by *cis*-  
175 phenylpropanoids and it has been shown to regulate bolting time by enhancing *FLC* expression  
176 (Guo *et al.*, 2011).

177

### 178 ***PEP2* can complement the Arabidopsis *ap2* mutant**

179 Both the *pep2* mutant in *A. alpina* and the *ap2* mutant in Arabidopsis show early flowering  
180 and similar floral defects, including the absence of petals and the transformation of sepals to  
181 carpels (Bergonzi *et al.*, 2013b; Bowman *et al.*, 1991; Nördstrom *et al.*, 2013). To check if both



182 genes have common functions, we expressed *PEP2* in the *ap2-7* mutant background under the  
183 control of its own promoter. We fused a 7.4 Kb *PEP2* genomic region spanning 4 Kb upstream  
184 of the translational start and 1.2 Kb downstream of the translational stop to the VENUS  
185 fluorescent protein, at the N- or C-terminus. Transgenic lines were first obtained in Col  
186 background. Homozygous lines obtained for the N-terminal VENUS (Col  
187 *ProPEP2::VENUS::PEP2* N6-1-3) and the C-terminal VENUS (Col *ProPEP2::PEP2::VENUS* C2-1-9)  
188 were subsequently crossed to *ap2-7*. When grown in SDs, the *PEP2* constructs complemented  
189 the early flowering phenotype of the *ap2-7* mutant (Fig. 2A-D). Moreover, the homeotic  
190 defects of the *ap2* mutant were restored by *PEP2*, indicating that the *A. alpina* *PEP2* gene  
191 regulates in a similar way to *AP2* flowering time and floral organ identity (Fig. 2E-H).

192 To test whether the effect of *PEP2* on *PEP1* expression was conserved in Arabidopsis for *AP2*  
193 and *FLC*, we combined the *ap2-7* mutation with the strong *FRI* allele from the San Feliu-2 (Sf-  
194 2) accession, which enhances Col *FLC* expression. Although the *ap2* mutation reduced the  
195 number of leaves to half in the *FRI* Sf-2 background, the expression of *FLC* is not altered in the  
196 apices of these plants at different developmental stages (before, during, or after 40 days of  
197 vernalization) (Fig. S2). These results indicate that, although the role of *AP2* and *PEP2*  
198 regarding flowering time regulation and floral organ identity is conserved, *AP2* does not  
199 regulate *FLC* expression in a *FRI* Sf-2 background (Fig. S2B).

200

### 201 ***PEP2* regulates the age-dependent response of *A. alpina* to vernalization**

202 We then investigated whether the *PEP1*-independent role of *PEP2* was similar to the one of  
203 *AP2* in Arabidopsis and therefore whether it regulated flowering through the age pathway.  
204 We first analyzed the accumulation of miR156 and the transcript level of the *A. alpina* *SPL5*, *9*  
205 and *15* (*AaSPL5*, *9* and *15*) in the apices of *pep2-1* and wild type seedlings grown for 3, 4, and  
206 6 weeks in LDs (Fig. S3). miR156 accumulation in the shoot apex was downregulated in older  
207 seedlings but a similar pattern was observed in *pep2-1* and the wild type (Fig. S3A). Transcript  
208 levels of *AaSPL5*, *9* and *15* were upregulated in older plants (Fig. S3B-D). For *AaSPL5* and *15*  
209 we observed no significant differences between *pep2-1* and the wild type, whereas *AaSPL9*  
210 mRNA levels differed between the two genotypes only in 6-week-old seedlings (Fig. S3B-D).  
211 These results are consistent with previous studies in Arabidopsis demonstrating that *AP2*  
212 regulates flowering through the age-pathway downstream of miR156 and the *SPLs*. As it was

213 previously shown that the age-dependent effect on flowering in *A. alpina* is only apparent  
214 after vernalization (Bergonzi *et al.*, 2013a; Wang *et al.*, 2011), we tested whether *PEP2* has an  
215 age-dependent role in vernalized plants. For this we vernalized 3-week-old wild type and  
216 *pep2-1* seedlings for 12 weeks and measured flowering time after the return to warm  
217 temperatures. We also included the *pep1-1* mutant in this experiment to rule out a *PEP1*-  
218 dependent effect of *PEP2* on flowering time. In accordance to previous studies, under these  
219 conditions the wild type did not flower after vernalization and only grew vegetatively (Fig. 3;  
220 and Wang *et al.*, 2011; Bergonzi *et al.*, 2013). Interestingly, *pep2-1* flowered with an average  
221 of 18 leaves and 17 days after vernalization, whereas vernalized *pep1-1* flowered with 27  
222 leaves similar to non-vernalized *pep1-1* plants grown continuously in long days (Fig. 3 and Fig.  
223 S4; Wang *et al.*, 2009; Bergonzi *et al.*, 2013). This data suggests that vernalization accelerates  
224 flowering in young *pep2-1* but not in *pep1-1* plants. The flowering time phenotype of the  
225 mutants is also in contrast to one in long days where *pep1-1* flowers earlier than *pep2-1*  
226 (Bergonzi *et al.*, 2013). Overall these results suggest that *PEP2* regulates the age-dependent  
227 response to vernalization in a *PEP1*-independent manner.

228 To understand how the young *pep2-1* plants accelerate flowering in response to vernalization,  
229 we analyzed the expression of *PEP1*, *AaSOC1*, *AaFUL*, *AaTFL1*, *AaLFY* and *AaAP1*. Three-week-  
230 old wild type, *pep2-1* and *pep1-1* apices from the main shoot were harvested before and  
231 during vernalization at 4, 8 and 12 weeks. In accordance with previous results obtained in  
232 seedlings, unvernallized 3-week-old *pep2-1* plants showed lower *PEP1* mRNA levels than the  
233 wild type (Fig. 4A; Bergonzi *et al.*, 2013). Nevertheless, *PEP1* transcript level was influenced in  
234 a similar way in *pep2-1* and wild type plants and *PEP1* was silenced after four weeks in cold  
235 (Fig. 4A). This data suggests that, despite the initial difference in *PEP1* expression, the lack of  
236 *PEP2* does not influence *PEP1* transcription in young apices during vernalization. The  
237 expression of *AaSOC1* was gradually up-regulated during vernalization, following the same  
238 pattern in the three genotypes (Fig. 4B). In contrast, *AaFUL*, *AaLFY* and *AaAP1* showed a  
239 differential increase in the wild type and the mutants after 8 and 12 weeks in vernalization  
240 (Fig. 4C, E and F). In young wild type plants *AaFUL*, *AaLFY* and *AaAP1* mRNA levels did not rise,  
241 indicating that flowering had not been initiated (Fig. 4C, E and F). Moreover, the *pep2-1*  
242 mutant showed higher levels of *AaLFY* and *AaAP1* than *pep1-1* after 12 weeks in vernalization  
243 (Fig. 3 and 4E and F). Interestingly, the *pep2-1* mutant also showed reduced expression of  
244 *AaTFL1* at the end of the cold treatment compared to *pep1-1* (Fig. 4D). Taken together, our

245 results indicate that *PEP2* activates *AaTFL1* and represses *AaFUL*, *AaLFY* and *AaAP1* in young  
246 apices during vernalization (Fig. 3). This role of *PEP2* is independent of *PEP1*, given that *pep1-*  
247 *1* plants vernalized at a young age flowered later than *pep2-1* and that *PEP1* expression was  
248 reduced to the same extent in wild type and *pep2-1* during vernalization (Fig. 3 and 4A).

249 To investigate whether the transcriptional regulation of *PEP2* on these floral meristem identity  
250 genes was also conserved in adult plants, we tested the expression of *AaFUL*, *AaLFY* and  
251 *AaAP1* during vernalization. Six-week-old wild type and *pep2-1* plants were exposed to 12  
252 weeks of cold and the mRNA levels of *AaLFY*, *AaAP1* and *AaFUL* was analyzed in the shoot  
253 apex before vernalization and 1, 3, 5, 8 and 12 weeks into vernalization. *AaFUL* mRNA levels  
254 were higher in *pep2-1* than in the wild type already after 8 weeks in vernalization (Fig. S4A).  
255 For *AaLFY* and *AaAP1* expression a significant increase was observed in the *pep2-1* mutant  
256 only at the end of the 12 weeks of cold (Fig. S4B and C). Overall these results suggest that *PEP2*  
257 delays flowering by keeping *AaFUL*, *AaLFY* and *AaAP1* repressed at the end of the 12 weeks of  
258 vernalization, when *PEP1* has already been silenced in the apices of both young and adult  
259 plants.

260

### 261 ***PEP2* is required to activate *PEP1* expression after vernalization**

262 To test the *PEP1*-dependent role of *PEP2* we exposed the *pep2-1* mutant and the wild type  
263 plants to different lengths of vernalization. Both genotypes were grown for 5 weeks in LDs,  
264 vernalized for 8, 12, 18 and 21 weeks, and transferred back to LD glasshouse conditions (Fig.  
265 5A and B). The *pep2-1* mutant showed a reduction in the number of days to flower emergence  
266 compared to the wild type in all durations of cold (Fig. 5C). In addition, inflorescences in *pep2-*  
267 *1* showed reduced floral reversion phenotypes and enhanced commitment of inflorescence  
268 branches to flowering (Fig. 5D-G). These results indicate that *PEP2* regulates flowering time  
269 and inflorescence architecture in *A. alpina*. However, the response of *pep2-1* still varied with  
270 the length of vernalization suggesting that other floral repressors might contribute to  
271 flowering in response to vernalization. Also, *PEP2* is required to maintain axillary shoots that  
272 are located just below the inflorescence in a vegetative state as all axillary branches in the  
273 *pep2-1* mutant commit to reproductive development (Fig. 5; Bergonzi et al., 2013).

274 As shown previously in the wild type, *PEP1* mRNA is up-regulated in the shoot apical meristem  
275 of the main shoot after a non-saturating vernalization (Fig. 6; Wang et al., 2009; Lazaro et al.,

276 2018). This unstable silencing of *PEP1* mRNA after cold was abolished in the *pep2-1* mutant,  
277 suggesting that *PEP2* is required to activate *PEP1* expression in the shoot apical meristem after  
278 insufficient vernalization (Fig. 6). The role of *PEP2* in the activation of *PEP1* after vernalization  
279 is also observed in the axillary branches. All axillary branches in the *pep2-1* mutant committed  
280 to flowering (Fig. 5B) and showed very low expression of *PEP1* when compared to wild type  
281 vegetative branches (Fig. 6). These results suggest that the major contribution of *PEP2* is to  
282 activate *PEP1* transcription after vernalization, both in the shoot apical meristem and in the  
283 vegetative axillary branches.

284

## 285 **MATERIALS AND METHODS**

### 286 *Plant material, growth conditions and phenotyping*

287 The *A. alpina* genotypes used in this paper were Pajares (wild type), the *pep2-1* mutant and  
288 the *pep1-1* mutant. The accession Pajares was collected in the Cordillera Cantábrica  
289 mountains in Spain at 1,400 meters altitude (42°59'32" N, 5°45'32" W). Both the *pep2-1* and  
290 the *pep1-1* mutant were isolated from an EMS mutagenesis in the Pajares background  
291 (Bergonzi *et al.*, 2013a; Nordstrom *et al.*, 2013; Wang *et al.*, 2009). For the phenotypic analysis  
292 plants were grown in LDs (16 h light and 8 h dark) under temperatures ranging from 20°C  
293 during the day to 18°C during the night. All vernalization treatments were performed at 4°C in  
294 SD conditions (8 h light and 16 h dark).

295 Flowering time in the young wild type, *pep2-1* and *pep1-1* plants was scored as the number of  
296 leaves at flowering and as the number of days to the first open flower after vernalization.  
297 Plants were grown for 3 weeks in LD cabinets, vernalized for 12 weeks, and moved back to LDs  
298 after cold.

299 The characterization of flowering time and inflorescence traits with different vernalization  
300 durations in the *pep2-1* mutant was performed together with the wild type and the *pep1-1*  
301 mutant in an experiment previously published (Fig. 6 in Lazaro *et al.*, 2018). The same data for  
302 control wild type plants was used in Lazaro *et al.*, 2018. Plants were grown for five weeks in  
303 LD greenhouse, vernalized for 8, 12, 18 and 21 weeks, and moved back to LD greenhouse  
304 conditions on the same day. Flowering time was measured by recording the date on which the  
305 first flower opened after vernalization. The number of flowering and vegetative branches and

306 the number of bracts in the inflorescence was measured at the end of flowering except for  
307 plants vernalized for 8 weeks when the measurements took place 14 weeks after  
308 vernalization.

309 The Arabidopsis genotypes used in this paper were Columbia-0 (Col-0) wild type, *ap2-7* and  
310 Col *FRI* San Feliu-2 (*Sf-2*) (Lee and Amasino, 1995). The *ap2-7* mutant was crossed to the  
311 Col *FRI Sf-2* and the *FRI ap2-7* plants were isolated from a selfed F2 progeny that  
312 showed *ap2* homeotic defects and late flowering.

313 For the flowering time experiments in Arabidopsis the total leaf number (rosette and cauline  
314 leaves) was scored at the time the first flower opened.

315

#### 316 *Construction of plasmids and plant transformation*

317 To obtain the *ap2-7 PEP2*–VENUS transgenic plant, a 7.4 Kb *PEP2* genomic region spanning 4  
318 Kb upstream of the translational start and 1.195 bp downstream of the translational stop was  
319 cloned by PCR (NCBI accession number LT669794.1). Subsequently, the VENUS:9Aa coding  
320 sequence was inserted either after the ATG or before the STOP codon of *PEP2* by employing  
321 the polymerase incomplete primer extension (PIPE) method (Klock *et al.*, 2008). Primers used  
322 for PIPE-cloning are summarized in Table S1. The generated recombinant DNA fragments were  
323 integrated in the pEarlyGate301 binary vector and transformed into Col through  
324 Agrobacterium mediated floral dip (Clough and Bent, 1998). Selected homozygous lines, Col  
325 *ProPEP2::VENUS::PEP2* N6-1-3 and Col *ProPEP2::PEP2::VENUS* C2-1-9, were crossed to *ap2-7*.

326

#### 327 *Gene Expression Analysis*

328 Gene expression analysis was performed on the wild type, *pep1-1* and *pep2-1*. For *pep2-1*  
329 samples, homozygous plants were selected after genotyping from a segregating population  
330 using a CAP marker (Primer F: CAGCTGCACGGTATGTTTTTC, primer R:  
331 GCTTTGTCATAAGCCCTGTG, and NdeI digestion).

332 For the analysis of the *PEP1* expression pattern, the wild type and *pep2-1* were grown for 6  
333 weeks in LDs and vernalized for 12 weeks. Main shoot apices were harvested before  
334 vernalization, during vernalization, and after vernalization (1, 2, 3 and 4 weeks after the plants  
335 returned to warm temperatures). Axillary vegetative apices were harvested from plants

336 growing in LDs 2, 3 and 4 weeks after vernalization. An average of 10 apices were pooled in  
337 each sample.

338 The expression of *PEP1*, *AaSOC1*, *AaFUL*, *AaTFL1*, *AaLFY* and *AaAP1* transcripts in the young  
339 and adult wild type, *pep1-1* and *pep2-1* was detected in seedlings grown for 3 (young) or 6  
340 weeks (adult) in LDs and vernalized for 12 weeks. Main shoot apices were harvested before  
341 vernalization and during cold, at 4, 8 and 12 weeks in vernalization. For the analysis of *AaSPL5*,  
342 *AaSPL9* and *AaSPL15* and miR156, the main shoot apex was harvested from 3-, 4- and 6-week  
343 old wild type and *pep2-1* plants growing in LDs. An average of 14 apices were pooled in each  
344 sample. Expression levels were normalized to both *AaPP2A* and *AaRAN3*, except for miR156  
345 which was normalized to snoR101.

346 The expression of *FLC* transcript was analyzed in the shoot apex of *FRI* and *FRI ap2-7* plants  
347 grown for 10 days before vernalization, during 40 days of vernalization and 10 and 20 days  
348 after the return to LD glasshouse conditions. Expression levels were normalized to *UBC21*.  
349 Total plant RNA was extracted using the RNeasy Plant Mini Kit (Qiagen), and a DNase  
350 treatment was performed with Ambion DNA-free kit (Invitrogen) to reduce any DNA  
351 contamination. Total RNA (1.5 µg) was used to synthesize cDNA through reverse transcription  
352 with SuperScript II Reverse Transcriptase (Invitrogen) and oligo dT(18) as primer. 2 µl of a  
353 cDNA dilution (1:5) was used as the template for each quantitative PCR (qPCR). For the analysis  
354 of miR156 and the SPLs, total RNA was extracted using the miRNeasy® Mini Kit (Qiagen), and  
355 a DNase treatment was performed with Ambion DNA-Free kit (Invitrogen) to reduce DNA  
356 contamination. 200 ng of RNA was used for reverse transcription of miR156 and SnoR101  
357 using miR156 and snoR101 specific primers. qPCRs were performed using a CFX96 and CFX384  
358 Real-Time System (Bio-Rad) and the iQ SYBR Green Supermix detection system. Each data  
359 point was derived from 2 or 3 independent biological replicates and is shown as mean ± s.d.m.

360 Primers used for qPCR for *PEP1*, *AaSOC1*, *AaFUL*, *AaTFL1*, *AaLFY*, *AaAP1*, *AaSPL5*, *AaSPL9*,  
361 *AaSPL15*, *AaPP2A*, *AaRAN3*, miR156 and SnoR101 were described previously (Bergonzi *et al.*,  
362 2013a; Lazaro *et al.*, 2018; Wang *et al.*, 2011; Wang *et al.*, 2009; Mateos *et al.*, 2017). Primers  
363 used for qPCR for *FLC* and *UBC21* were also described elsewhere (Crevillen *et al.*, 2013;  
364 Czechowski *et al.*, 2005).

365

366 *Statistical analysis*



367 Statistical analyses were performed using the R software. To detect significant differences in  
368 gene expression we controlled for a false discovery rate of 0.05 when conducting multiple  
369 pairwise comparisons by using Benjamini-Hochberg-corrected p-values. Treatments with  
370 significant differences are depicted with letters or asterisks. For the *pep2-1* physiological  
371 analysis we conducted multiple pairwise Bonferroni tests ( $\alpha = 0.05$ ) to detect significant  
372 differences between the wild type and *pep2-1*. Here, a nonparametric test could not be  
373 conducted due to ties created during rank assignment.

374

### 375 *RNAseq analysis*

376 For differential gene expression analysis, we used the RNA sequencing method on apices from  
377 the 3-week-old wild type, the *pep2-1* and the *pep1-1* mutant. *pep2-1* homozygous plants were  
378 genotyped from a segregating population using the CAP marker described above. RNA was  
379 isolated as described above and total RNA integrity was confirmed on the Agilent BioAnalyzer.  
380 The library preparation and sequencing were performed at the Max Planck Genome Center  
381 Cologne, Germany (<https://mpgc.mpipz.mpg.de/home/>). RNA sequencing was performed with  
382 three biological replicates per sample. The libraries were prepared from 1 mg total RNA using  
383 the TruSeq RNA kit (Illumina) and sequenced 100-bp single-end reads on HiSeq2500  
384 (Illumina). Reads from all samples were mapped on *A. alpina* reference genome (Willing *et*  
385 *al.*, 2015) using TopHat (Trapnell *et al.*, 2009) with default parameters. Afterwards, CuffDiff  
386 (Trapnell *et al.*, 2010) was used to estimate the mRNA level of each gene by calculating  
387 fragments per kilobase of exon model per million reads mapped (FPKM). To calculate the  
388 differential gene expression among the samples FPKM values were used. A  $\log_2$  fold change  
389 ( $L_2FC$ )  $\geq 1$  for up-regulated genes and  $L_2FC \leq -1$  for down-regulated genes, both with q-value  
390 (adjusted p-value)  $\leq 0.05$  was used for further analysis.

391 GO enrichment was performed with the BiNGO plug-in (Maere *et al.*, 2005) implemented in  
392 Cytoscape V3.5.1 (Cline *et al.*, 2007). A hypergeometric test was applied to determine the  
393 enriched genes and the Benjamini–Hochberg FDR correction (Benjamini and Hochberg, 1995)  
394 was performed in order to limit the number of false positives. The FDR was set up to 0.05.

395 Sequencing data from this study have been deposited in Gene Expression Omnibus (GEO)  
396 under accession number GSE117977. Sequences of genes studied can be found in the  
397 GenBank/EMBL databases under the following accession numbers: *PEP2*

398 (AALP\_AA7G245300), cDNA of *PEP1* (FJ755930), coding sequence of *AaLFY* (JF436956), coding  
399 sequence of *AaSOC1* (JF436957), *AaAP1* (AALP\_AA2G117200), coding sequence of *AaTFL1*  
400 (JF436953), *AaFUL* (Aa\_G837900).

401

## 402 **DISCUSSION**

403 Understanding the role of prolonged exposure to low temperatures in flowering is of  
404 particular importance in perennial species that will overwinter several times during their life-  
405 cycle. In temperate perennials prolonged exposure to cold regulates later stages of flowering  
406 such as uniform bud break in the spring, whereas in alpine species ensure floral formation and  
407 commitment before plants experience favorable environmental conditions for anthesis  
408 (Diggle, 1997; Lazaro *et al.*, 2018; Meloche and Diggle, 2001). The maintenance of vegetative  
409 development after flowering, which is important for the perennial life strategy, is regulated  
410 by the seasonal cycling of floral repressors and the differential response of meristems to  
411 flower inductive stimuli due to age-related factors (Koskela *et al.*, 2012; Wang *et al.*, 2011;  
412 Wang *et al.*, 2009). Here we characterized the role of the *A. alpina* floral repressor *PEP2*, the  
413 orthologue of the Arabidopsis *AP2*. Previous studies had demonstrated that *PEP2* regulates  
414 flowering through a *PEP1*-dependent and a *PEP1*-independent pathway (Bergonzi *et al.*,  
415 2013a). Our transcriptomic analysis indicated that *PEP2* influences the expression of genes  
416 involved in several developmental processes. Many of the identified genes though, might not  
417 be regulated directly by *PEP2* but by complex downstream genetic interactions (Fig. 1 and Fig.  
418 S1). We also found both floral promoters and repressors differentially expressed in the *pep2*  
419 mutant. In Arabidopsis the *AP2* protein was immunoprecipitated from the promoter region of  
420 *SOC1* (Yant *et al.*, 2010). However, in our study the effect of *PEP2* on *AaSOC1* seems to be  
421 through *PEP1* (Fig. 1). To characterize the *PEP1*-dependent and the *PEP1*-independent role of  
422 *PEP2* on flowering we also employed physiological analysis and followed the expression of  
423 flowering time and meristem identity genes during the *A. alpina* life-cycle. These data  
424 indicated that *PEP2* regulates i) the age-dependent response to vernalization and ii) the  
425 temporal cycling of the floral repressor *PEP1* by ensuring the activation of *PEP1* expression  
426 after vernalization.

427

428 *PEP2* regulates the age-dependent response to vernalization



429 *PEP2* could rescue the early flowering phenotype of the Arabidopsis *ap2-7* mutant suggesting  
430 that its role on flowering time might be conserved (Fig. 2). In Arabidopsis, *AP2* is post-  
431 transcriptionally regulated by miR172, and *miR172b* is placed in the age pathway as it is  
432 transcriptionally controlled by the miR156 targets *SPL9* and *SPL15* (Hyun *et al.*, 2016; Wu *et*  
433 *al.*, 2009). *AP2* also negatively regulates its own expression by directly binding to its own  
434 genomic locus, as well as to the loci of its regulators *miR156e*, *miR172b* and *FUL*, suggesting  
435 that *AP2* is transcriptionally regulated by multiple feedback loops (Balanza *et al.*, 2018;  
436 Schwab *et al.*, 2005; Yant *et al.*, 2010). The *AP2* protein was also immunoprecipitated from  
437 the chromatin of floral integrators and genes required for floral meristem development such  
438 as *SOC1*, *AGAMOUS (AG)* and *AP1* (Yant *et al.*, 2010). The transcription of genes such as *SOC1*  
439 and *FUL* is also controlled by upstream regulators in the age pathway. *SPL9* has been reported  
440 to bind to the first intron of *SOC1* and *SPL15* to *FUL* and *miR172b* (Hyun *et al.*, 2016; Wang *et*  
441 *al.*, 2009). Overall, this complex genetic circuit that includes *AP2* might contribute to the fast  
442 life-cycle of Arabidopsis, in which floral transition takes place soon after reproductive  
443 competence is acquired. Contrary to Arabidopsis, in *A. alpina* reproductive competence is  
444 uncoupled from flowering initiation. *A. alpina* plants become competent to flower after  
445 growing for five weeks in long day conditions but only initiate flowering when they are  
446 exposed to vernalization (Wang *et al.*, 2009). This suggests that flowering in *A. alpina* is  
447 regulated by a strong interplay between the age and the vernalization pathways. Members of  
448 the *SPL* and *AP2* families (e.g. *AaSPL15* and *AaTOE2*) are transcriptionally repressed by *PEP1*  
449 in addition to the post-transcriptional and post-translational regulation by the microRNAs  
450 (Bergonzi *et al.*, 2013a; Chen, 2004; Hyun *et al.*, 2016; Mateos *et al.*, 2017; Xu *et al.*, 2016).  
451 Although, *FLC* in Arabidopsis targets a similar set of genes the strong interplay between the  
452 age and the vernalization pathway is most apparent in *A. alpina* (Deng *et al.*, 2011; Mateos *et*  
453 *al.*, 2017). Vernalization in *A. alpina* provides the condition where the age effect on flowering  
454 is apparent as it silences *PEP1*. Gradual changes in the accumulation of miR156 and the  
455 expression of the *SPLs* can be observed in the shoot apex of *A. alpina* plants that get older in  
456 LDs (Bergonzi *et al.*, 2013a). However, the accumulation of downstream regulators in the age  
457 pathway, such as of the miR172, only increase in the shoot apex during vernalization and upon  
458 floral transition (Bergonzi *et al.*, 2013a). Here we show that the expression of miR156 and of  
459 *AaSPL5* and *15* is not influenced in *pep2* plants grown in LDs (Fig. S3, Fig. 1E-G). Given that  
460 *PEP2* acts partially through *PEP1*, the lack of an effect in *pep2-1* on *AaSPL15* can be either due

461 to the residual *PEP1* expression in the *pep2-1* mutant or to the existence of compensatory  
462 genetic mechanisms. Interestingly, *AaSPL9* mRNA levels were reduced in 6-week-old *pep2-1*  
463 seedlings compared to the wild type (Fig. S3). This effect of *PEP2* on *AaSPL9*, though, cannot  
464 be explained by the feedback loops described in Arabidopsis as *AaSPL9* transcript levels would  
465 be expected to be higher in *pep2-1* compared to the wild type (Fig. S3; Yant *et al.*, 2010).

466 The *A. alpina* orthologue of *TFL1* (*AaTFL1*) has been previously reported to influence the effect  
467 of vernalization in an age-dependent manner, although its expression pattern does not differ  
468 between juvenile and adult apices before vernalization (Wang *et al.*, 2011). Here we show that  
469 vernalization accelerated flowering in young *pep2-1* seedlings compared to *pep1-1*, suggesting  
470 *PEP2* also regulates the age-dependent response to vernalization in a *PEP1* independent  
471 pathways (Fig. 3). Interestingly, in our RNAseq analysis *AaTFL1* transcripts were reduced in the  
472 *pep2-1* mutant suggesting that *PEP2*, together with or through *AaTFL1*, sets an age threshold  
473 for flowering in response to vernalization. One major difference between *AaTFL1* and *PEP2*,  
474 though, is that lines with reduced *AaTFL1* activity do not flower without vernalization. These  
475 results suggest that *PEP2* plays additional roles in the regulation of flowering time in *A. alpina*.  
476 Transcriptomic experiments in Arabidopsis also showed that *TFL1* mRNA is down-regulated in  
477 *ap2* inflorescences compared to the wild type (Yant *et al.*, 2010). However, no direct binding  
478 of AP2 to the *TFL1* locus has been detected by ChIP-Seq and therefore it is unclear whether  
479 there is a direct or indirect effect of AP2 on *TFL1* transcription (Yant *et al.*, 2010).

480

#### 481 *PEP2 ensures the activation of PEP1 after vernalization*

482 Previous studies in *A. alpina* have demonstrated that *PEP2* regulates flowering in response to  
483 vernalization by enhancing the expression of *PEP1* (Bergonzi *et al.*, 2013a). Here we show that  
484 the major role of *PEP2* in *PEP1* activation takes place after vernalization. *PEP1* expression in  
485 *A. alpina* is temporarily silenced during prolonged exposure to cold to define inflorescence  
486 fate, while it is up-regulated after vernalization to repress flowering in axillary branches and  
487 define the inflorescence fate (Lazaro *et al.*, 2018; Wang *et al.*, 2009). We have recently shown  
488 that the duration of vernalization influences *PEP1* reactivation in the shoot apex after the  
489 return to warm temperatures (Lazaro *et al.*, 2018). Phenotypes correlated with high *PEP1*  
490 mRNA levels after vernalization (e.g. floral reversion and the presence of vegetative axillary  
491 branches) were compromised in the *pep2-1* mutant (Fig. 5; Lazaro *et al.*, 2018). Accordingly,

492 *PEP1* mRNA levels were reduced in vernalized *pep2-1* plants compared to the wild type both  
493 in the inflorescence stem and the axillary branches (Fig. 6; Wang et al., 2009; Lazaro et al.,  
494 2018). These results suggest that *PEP2* contributes to the perennial life-cycle and regulates  
495 perennial specific traits by activating *PEP1* after vernalization. In Arabidopsis the introgression  
496 of the *FRI* allele from the Sf-2 accession into Col extends the duration of cold temperatures  
497 required to silence *FLC* (Searle et al., 2006). Northern Arabidopsis accessions such as Lov-1  
498 require several months of vernalization to achieve *FLC* silencing and similar to *A. alpina*  
499 Pajares, a shorter duration of cold temperatures causes *FLC* reactivation (Shindo et al., 2006).  
500 The link between *AP2* and *FLC* is not clear in Arabidopsis. *AP2* does not bind to *FLC* locus in  
501 ChIP-seq experiments and in our study *FLC* expression was not altered in plants where the  
502 *ap2-7* mutant allele was introgressed into Col *FRI* Sf-2 background (Fig. S3; Yant et al., 2010).  
503 However, as the strongest difference in *PEP1* expression in the *pep2-1* mutant was after  
504 vernalization the effect of *AP2* in the Lov-1 accession should be analyzed to rule out a role of  
505 *AP2* on *FLC* reactivation after insufficient vernalization.

506 The unstable silencing of *FLC* involves changes in the accumulation of the H3 trimethylation at  
507 Lysine 27 (H3K27me3) (Angel et al., 2011; Coustham et al., 2012). The pattern of the  
508 H3K27me3 mark at the *PEP1* locus also correlates with changes in *PEP1* mRNA levels in *A.*  
509 *alpina* (Wang et al., 2009). *PEP1* shows a much higher and broader increase of H3K27me3  
510 during the cold than *FLC*, and H3K27me3 levels rapidly decrease at *PEP1* after short  
511 vernalization periods (Angel et al., 2011; Lazaro et al., 2018; Wang et al., 2009). Although the  
512 proteins regulating histone modifications at the *PEP1* locus are not known, in Arabidopsis  
513 resetting of the epigenetic memory of *FLC* is dependent on the presence of TrxG components  
514 and the Jumonji C (JmjC) domain-containing demethylases EARLY FLOWERING 6 (ELF6) and  
515 RELATIVE OF EARLY FLOWERING 6 (REF6) (Crevillen et al., 2014; Noh et al., 2004; Yun et al.,  
516 2011). It has been shown that *AP2* has the ability to interact with a chromatin remodeling  
517 factor *HISTONE DEACETYLASE 19 (HDA19)* to transcriptionally repress one of its targets  
518 (Krogan et al., 2012), but *AP2* has never been associated to histone demethylases.

519 We have recently demonstrated that *PEP1* is stably silenced in the shoot apical meristem of  
520 adult plants that commit to flowering during prolonged exposure to cold (Lazaro et al., 2018).  
521 In juvenile plants a similar length of vernalization fails to initiate flowering even if *PEP1* is  
522 silenced during cold (Lazaro et al., 2018). Floral commitment during vernalization is correlated  
523 with a higher expression of the floral meristem identity genes, *AaFUL*, *AaLFY* and *AaAP1* which

524 are repressed by *PEP2* (Lazaro *et al.*, 2018). This is evident by the precocious up-regulation of  
525 *AaFUL*, *AaLFY* and *AaAP1* mRNA levels in vernalized *pep2-1* plants compared to the wild type  
526 (Fig. 4 and S4). Although, the link between *PEP2* and *PEP1* resetting is not clear it seems that  
527 the achievement of floral commitment during vernalization is negatively correlated with *PEP1*  
528 up-regulation after the return to warm temperatures (Lazaro *et al.*, 2018). In Arabidopsis, *AP2*  
529 is not known to influence *FLC* transcription. However, *AP2* has been reported to be  
530 transcriptionally repressed by *FUL* and *FUL* overexpressing plants show reduced *FLC*  
531 expression (Balanz *et al.*, 2014; Balanza *et al.*, 2018). These results suggest that *FUL* might  
532 regulate *FLC* transcription independently or through *AP2*. These might also indicate that in *A.*  
533 *alpina* the role of *PEP2* on *PEP1* expression might implicate other flowering time regulators,  
534 genes involved in the age pathway and genes ensuring floral commitment during  
535 vernalization. However, since *PEP1* also transcriptionally regulates genes in these genetic  
536 pathways feedback mechanisms might also occur (Mateos *et al.*, 2017).

537

## 538 **CONCLUSION**

539 Our study demonstrates the instrumental role of *PEP2* in *A. alpina* regulating the age-  
540 dependent response to vernalization and facilitating the activation of *PEP1* after vernalization.  
541 As both roles of *PEP2* focus on whether floral commitment has been achieved during  
542 vernalization, they might not be completely independent. Upstream regulators of floral  
543 meristem identity genes such as *PEP2* might regulate the response to vernalization of  
544 individual meristems and contribute to the complex plant architecture of perennials.

545

## 546 **ACKNOWLEDGEMENTS**

547 We would like to thank SPP1530 and CEPLAS for funding to MCA, SPP1529 for funding to AP  
548 and KN and Purkyně fellowship from AS CR to AP. We would also like to thank Margaret Kox  
549 for critical reading of the manuscript.

550

## 551 **SUPPLEMENTARY DATA**

552 **Dataset S1.** Transcripts identified as being differentially expressed in *pep2-1* compared to  
553 the wild type.

554 **Dataset S2.** Transcripts identified as being differentially expressed in *pep1-1* compared to  
555 the wild type.

556 **Dataset S3.** Transcripts identified as being differentially expressed in *pep2-1* compared to  
557 *pep1-1*.

558 **Table S1.** Primers used for PIPE-cloning of the *PEP2* locus

559 **Table S2.** Statistical differences in Figure S2 determined by multiple pairwise comparisons  
560 using Benjamini-Hochberg-corrected p-values comparing *FLC* mRNA levels between *FRI* and  
561 *FRI ap2-7* at different developmental stages.

562 **Table S3.** Statistical differences in Figure 6 determined by multiple pairwise comparisons using  
563 Benjamini-Hochberg-corrected p-values comparing *PEP1* mRNA levels between *pep2-1* and  
564 the wild type at different developmental stages.

565 **Fig. S1:** GO enriched categories in RNAseq experiment.

566 **Fig. S2.** *AP2* does not affect *FLC* expression in Arabidopsis.

567 **Fig. S3.** The expression level of *miR156*, *AaSPL5* and *AaSPL15* does not differ between wild  
568 type and *pep2-1* plants growing in long days.

569 **Fig. S4.** *PEP2* regulates the age-dependent response of *A. alpina* to vernalization.

570 **Fig. S5.** *PEP2* regulates *AaFUL*, *AaTFL1*, *AaLFY* and *AaAP1* expression during vernalization in  
571 adult plants.

## REFERENCES

- Amasino R.** 2009. Floral induction and monocarpic versus polycarpic life histories. *Genome Biology* **10**.
- Angel A, Song J, Dean C, Howard M.** 2011. A Polycomb-based switch underlying quantitative epigenetic memory. *Nature* **476**, 105-108.
- Aukerman MJ, Sakai H.** 2003. Regulation of flowering time and floral organ identity by a microRNA and its *APETALA2*-like target genes. *Plant Cell* **15**, 2730-2741.
- Balanz V, Martnez-Fernndez I, Ferrndiz C.** 2014. Sequential action of *FRUITFULL* as a modulator of the activity of the floral regulators *SVP* and *SOC1*. *Journal of Experimental Botany* **65**, 1193-1203.
- Balanza V, Martinez-Fernandez I, Sato S, Yanofsky MF, Kaufmann K, Angenent GC, Bemer M, Ferrandiz C.** 2018. Genetic control of meristem arrest and life span in Arabidopsis by a *FRUITFULL-APETALA2* pathway. *Nature Communications* **9**.
- Benjamini Y, Hochberg Y.** 1995. Controlling the False Discovery Rate - a Practical and Powerful Approach to Multiple Testing. *Journal of the Royal Statistical Society Series B-Methodological* **57**, 289-300.
- Bergonzi S, Albani MC.** 2011. Reproductive competence from an annual and a perennial perspective. *Journal of Experimental Botany* **62**, 4415-4422.
- Bergonzi S, Albani MC, van Themaat EVL, Nordstrom KJV, Wang RH, Schneeberger K, Moerland PD, Coupland G.** 2013. Mechanisms of Age-Dependent Response to Winter Temperature in Perennial Flowering of *Arabis alpina*. *Science* **340**, 1094-1097.
- Billings WD, Mooney HA.** 1968. Ecology of Arctic and Alpine Plants. *Biological Reviews of the Cambridge Philosophical Society* **43**, 481-529.
- Bowman JL, Smyth DR, Meyerowitz EM.** 1991. Genetic Interactions among Floral Homeotic Genes of Arabidopsis. *Development* **112**, 1-20.
- Castro PH, Couto D, Freitas S, Verde N, Macho A, Huguet S, Botella MA, Ruiz-Albert J, Tavares RM, Bejarano ER, Azevedo H.** 2016. SUMO proteases ULP1c and ULP1d are required for development and osmotic stress responses in *Arabidopsis thaliana*. *Plant Molecular Biology* **92**, 143-159.
- Chen XM.** 2004. A microRNA as a translational repressor of *APETALA2* in *Arabidopsis* flower development. *Science* **303**, 2022-2025.

- Cline MS, Smoot M, Cerami E, Kuchinsky A, Landys N, Workman C, Christmas R, Avila-Campilo I, Creech M, Gross B, Hanspers K, Isserlin R, Kelley R, Killcoyne S, Lotia S, Maere S, Morris J, Ono K, Pavlovic V, Pico AR, Vailaya A, Wang PL, Adler A, Conklin BR, Hood L, Kuiper M, Sander C, Schmulevich I, Schwikowski B, Warner GJ, Ideker T, Bader GD.** 2007. Integration of biological networks and gene expression data using Cytoscape. *Nature Protocols* **2**, 2366-2382.
- Clough SJ, Bent AF.** 1998. Floral dip: a simplified method for *Agrobacterium*-mediated transformation of *Arabidopsis thaliana*. *Plant Journal* **16**, 735-743.
- Conti L, Price G, O'Donnell E, Schwessinger B, Dominy P, Sadanandom A.** 2008. Small Ubiquitin-Like Modifier Proteases OVERLY TOLERANT TO SALT1 and-2 Regulate Salt Stress Responses in *Arabidopsis*. *Plant Cell* **20**, 2894-2908.
- Coustham V, Li PJ, Strange A, Lister C, Song J, Dean C.** 2012. Quantitative Modulation of Polycomb Silencing Underlies Natural Variation in Vernalization. *Science* **337**, 584-587.
- Crevillen P, Sonmez C, Wu Z, Dean C.** 2013. A gene loop containing the floral repressor *FLC* is disrupted in the early phase of vernalization. *Embo Journal* **32**, 140-148.
- Crevillen P, Yang HC, Cui X, Greeff C, Trick M, Qiu Q, Cao XF, Dean C.** 2014. Epigenetic reprogramming that prevents transgenerational inheritance of the vernalized state. *Nature* **515**, 587-590.
- Czechowski T, Stitt M, Altmann T, Udvardi MK, Scheible WR.** 2005. Genome-wide identification and testing of superior reference genes for transcript normalization in *Arabidopsis*. *Plant Physiology* **139**, 5-17.
- Deng WW, Ying H, Helliwell CA, Taylor JM, Peacock WJ, Dennis ES.** 2011. FLOWERING LOCUS C (FLC) regulates development pathways throughout the life cycle of *Arabidopsis*. *Proceedings of the National Academy of Sciences of the United States of America* **108**, 6680-6685.
- Diggle PK.** 1997. Extreme preformation in alpine *Polygonum viviparum*: An architectural and developmental analysis. *American Journal of Botany* **84**, 154-169.
- Guo D, Wong WS, Xu WZ, Sun FF, Qing DJ, Li N.** 2011. *Cis-cinnamic acid-enhanced 1* gene plays a role in regulation of *Arabidopsis* bolting. *Plant Molecular Biology* **75**, 481-495.
- Hyun Y, Richter R, Vincent C, Martinez-Gallegos R, Porri A, Coupland G.** 2016. Multi-layered Regulation of SPL15 and Cooperation with SOC1 Integrate Endogenous Flowering Pathways at the *Arabidopsis* Shoot Meristem. *Developmental Cell* **37**, 254-266.



- Keith RA, Mitchell-Olds T.** 2017. Testing the optimal defense hypothesis in nature: Variation for glucosinolate profiles within plants. *Plos One* **12**, e0180971.
- Klock HE, Koesema EJ, Knuth MW, Lesley SA.** 2008. Combining the polymerase incomplete primer extension method for cloning and mutagenesis with microscreening to accelerate structural genomics efforts. *Proteins-Structure Function and Bioinformatics* **71**, 982-994.
- Koskela EA, Mouhu K, Albani MC, Kurokura T, Rantanen M, Sargent DJ, Battey NH, Coupland G, Elomaa P, Hytonen T.** 2012. Mutation in *TERMINAL FLOWER1* Reverses the Photoperiodic Requirement for Flowering in the Wild Strawberry *Fragaria vesca*. *Plant Physiology* **159**, 1043-1054.
- Kotoda N, Iwanami H, Takahashi S, Abe K.** 2006. Antisense expression of *MdTFL1*, a *TFL1*-like gene, reduces the juvenile phase in apple. *Journal of the American Society for Horticultural Science* **131**, 74-81.
- Krogan NT, Hogan K, Long JA.** 2012. APETALA2 negatively regulates multiple floral organ identity genes in *Arabidopsis* by recruiting the co-repressor TOPLESS and the histone deacetylase HDA19. *Development* **139**, 4180-4190.
- Lazaro A, Obeng-Hinne E, Albani MC.** 2018. Extended Vernalization Regulates Inflorescence Fate in *Arabidopsis* by Stably Silencing *PERPETUAL FLOWERING1*. *Plant Physiology* **176**, 2819-2833.
- Lee I, Amasino RM.** 1995. Effect of Vernalization, Photoperiod, and Light Quality on the Flowering Phenotype of Arabidopsis Plants Containing the *FRIGIDA* Gene. *Plant Physiology* **108**, 157-162.
- Maere S, Heymans K, Kuiper M.** 2005. BiNGO: a Cytoscape plugin to assess overrepresentation of Gene Ontology categories in Biological Networks. *Bioinformatics* **21**, 3448-3449.
- Mateos JL, Tilmes V, Madrigal P, Severing E, Richter R, Rijkenberg CWM, Krajewski P, Coupland G.** 2017. Divergence of regulatory networks governed by the orthologous transcription factors FLC and PEP1 in Brassicaceae species. *Proceedings of the National Academy of Sciences of the United States of America* **114**, E11037-E11046.
- Mathieu J, Yant LJ, Murdter F, Kuttner F, Schmid M.** 2009. Repression of Flowering by the miR172 Target SMZ. *Plos Biology* **7**, e1000148.
- Meloche CG, Diggle PK.** 2001. Preformation, architectural complexity, and developmental flexibility in *Acomastylis rossii* (Rosaceae). *American Journal of Botany* **88**, 980-991.



**Michaels SD, Amasino RM.** 1999. *FLOWERING LOCUS C* encodes a novel MADS domain protein that acts as a repressor of flowering. *Plant Cell* **11**, 949-956.

**Mohamed R, Wang CT, Ma C, Shevchenko O, Dye SJ, Puzey JR, Etherington E, Sheng XY, Meilan R, Strauss SH, Brunner AM.** 2010. *Populus CEN/TFL1* regulates first onset of flowering, axillary meristem identity and dormancy release in *Populus*. *Plant Journal* **62**, 674-688.

**Noh B, Lee SH, Kim HJ, Yi G, Shin EA, Lee M, Jung KJ, Doyle MR, Amasino RM, Noh YS.** 2004. Divergent roles of a pair of homologous jumonji/zinc-finger-class transcription factor proteins in the regulation of Arabidopsis flowering time. *Plant Cell* **16**, 2601-2613.

**Nördstrom KJ, Albani MC, James GV, Gutjahr C, Hartwig B, Turck F, Paszkowski U, Coupland G, Schneeberger K.** 2013. Mutation identification by direct comparison of whole-genome sequencing data from mutant and wild-type individuals using *k*-mers. *Nat Biotechnol* **31**, 325-330.

**Nordstrom KJV, Albani MC, James GV, Gutjahr C, Hartwig B, Turck F, Paszkowski U, Coupland G, Schneeberger K.** 2013. Mutation identification by direct comparison of whole-genome sequencing data from mutant and wild-type individuals using *k*-mers. *Nature Biotechnology* **31**, 325-330.

**Park JY, Kim H, Lee I.** 2017. Comparative analysis of molecular and physiological traits between perennial *Arabis alpina* Pajares and annual *Arabidopsis thaliana* Sy-0. *Scientific Reports* **7**, 13348.

**Schmid M, Uhlenhaut NH, Godard F, Demar M, Bressan R, Weigel D, Lohmann JU.** 2003. Dissection of floral induction pathways using global expression analysis. *Development* **130**, 6001-6012.

**Schwab R, Palatnik JF, Riester M, Schommer C, Schmid M, Weigel D.** 2005. Specific effects of MicroRNAs on the plant transcriptome. *Developmental Cell* **8**, 517-527.

**Searle I, He YH, Turck F, Vincent C, Fornara F, Krober S, Amasino RA, Coupland G.** 2006. The transcription factor FLC confers a flowering response to vernalization by repressing meristem competence and systemic signaling in *Arabidopsis*. *Genes & Development* **20**, 898-912.

**Sheldon CC, Rouse DT, Finnegan EJ, Peacock WJ, Dennis ES.** 2000. The molecular basis of vernalization: The central role of *FLOWERING LOCUS C (FLC)*. *Proceedings of the National Academy of Sciences of the United States of America* **97**, 3753-3758.

- Shindo C, Lister C, Crevillen P, Nordborg M, Dean C.** 2006. Variation in the epigenetic silencing of *FLC* contributes to natural variation in Arabidopsis vernalization response. *Genes & Development* **20**, 3079-3083.
- Trapnell C, Pachter L, Salzberg SL.** 2009. TopHat: discovering splice junctions with RNA-Seq. *Bioinformatics* **25**, 1105-1111.
- Trapnell C, Williams BA, Pertea G, Mortazavi A, Kwan G, van Baren MJ, Salzberg SL, Wold BJ, Pachter L.** 2010. Transcript assembly and quantification by RNA-Seq reveals unannotated transcripts and isoform switching during cell differentiation. *Nature Biotechnology* **28**, 511-517.
- Wang RH, Albani MC, Vincent C, Bergonzi S, Luan M, Bai Y, Kiefer C, Castillo R, Coupland G.** 2011. *Aa TFL1* Confers an Age-Dependent Response to Vernalization in Perennial *Arabis alpina*. *Plant Cell* **23**, 1307-1321.
- Wang RH, Farrona S, Vincent C, Joecker A, Schoof H, Turck F, Alonso-Blanco C, Coupland G, Albani MC.** 2009. *PEP1* regulates perennial flowering in *Arabis alpina*. *Nature* **459**, 423-427.
- Willing EM, Rawat V, Maumus F, James GV, Nordström KJV, Becker C, Warthmann N, Chica C, Szarynska B, Zytnicki M, Albani MC, Kiefer C, Bergonzi S, Castaings L, Mateos JL, Berns MC, Bujdosó N, Piofczyk T, de Lorenzo L, Barrero-Sicilia C, Mateos I, Piednoël M, Hagemann J, Chen-Min-Tao R, Iglesias-Fernández R, Schuster SC, Alonso-Blanco C, Roudier F, Carbonero P, Paz-Ares J, Davis SJ, Pecinka A, Quesneville H, Colot V, Lysak MA, Weigel D, Coupland G, Schneeberger K.** 2015. Lack of symmetric CG methylation and long-lasting retrotransposon activity have shaped the genome of *Arabis alpina*, *Nature Plants* **1**, 14023.
- Wu G, Park MY, Conway SR, Wang JW, Weigel D, Poethig RS.** 2009. The sequential action of miR156 and miR172 regulates developmental timing in Arabidopsis. *Cell* **138**, 750-759.
- Wu G, Poethig RS.** 2006. Temporal regulation of shoot development in *Arabidopsis thaliana* by *miR156* and its target *SPL3*. *Development* **133**, 3539-3547.
- Xu ML, Hu TQ, Zhao JF, Park MY, Earley KW, Wu G, Yang L, Poethig RS.** 2016. Developmental Functions of miR156-Regulated *SQUAMOSA PROMOTER BINDING PROTEIN-LIKE (SPL)* Genes in *Arabidopsis thaliana*. *Plos Genetics* **12**, e1006263.
- Yant L, Mathieu J, Dinh TT, Ott F, Lanz C, Wollmann H, Chen XM, Schmid M.** 2010. Orchestration of the Floral Transition and Floral Development in Arabidopsis by the Bifunctional Transcription Factor APETALA2. *Plant Cell* **22**, 2156-2170.

**Yun H, Hyun Y, Kang MJ, Noh YS, Noh B, Choi Y.** 2011. Identification of regulators required for the reactivation of *FLOWERING LOCUS C* during Arabidopsis reproduction. *Planta* **234**, 1237-1250.

## FIGURE LEGENDS

**Fig. 1. Differentially expressed genes in *pep2* and *pep1 A. alpina* mutants. (A and B)** Venn diagram of significantly up-regulated (A) and down-regulated (B) genes in *pep2-1* compared to the wild type (WT) and *pep1-1* compared to the WT. **(C and D)** Venn diagram of significantly up-regulated (C) and down-regulated (D) genes in *pep2-1* compared to the WT and in *pep2-1* compared to *pep1-1*. **(E-G)** Flowering time genes differentially expressed in *pep2-1* compared to the WT (E), *pep1-1* compared to the WT (F) and *pep2-1* compared to *pep1-1* (G). Expression values are based on RNA-sequencing.

**Fig. 2. PEP2 can complement the flowering and floral phenotype of the Arabidopsis *ap2-7* mutant. (A and B)** Phenotypes of Col wild type, the *ap2-7* mutant, the Col *ProPEP2::VENUS::PEP2* N6-1-3 and the *ap2-7 ProPEP2::VENUS::PEP2* N6-1-3 lines grown in SDs (A) and number of leaves at flowering (B). **(C and D)** Col, the *ap2-7* mutant, the Col *ProPEP2::PEP2::VENUS* C2-1-9 and the *ap2-7 ProPEP2::PEP2::VENUS* C2-1-9 lines grown in SDs (C) and number of leaves at flowering (D). (A and C) Whole plant pictures were taken 57DAG. Bar = 3cm. In B and D asterisks stand for significant differences determined by a Student T-test ( $p$ -value $<0.01$ ). Error bars indicate s.d.m. **(E to F)** Inflorescence of Col wild type (E) *ap2-7* (F), *ap2-7 ProPEP2::VENUS::PEP2* N6-1-3 (G) and *ap2-7 ProPEP2::PEP2::VENUS* C2-1-9 (H) taken 73DAG in SDs.

**Fig. 3. PEP2 regulates the age-dependent response of *A. alpina* to vernalization. (A)** Picture of 3-week-old wild type (WT), *pep1-1* and *pep2-1* vernalized for 12 weeks followed by 2 weeks in LDs. Bar = 5cm. **(B)** Flowering time demonstrated as the number of leaves at flowering of 3-week-old WT, *pep1-1* and *pep2-1* mutants vernalized for 12 weeks. The WT did not flower (NF). The asterisk stands for a significant difference in the total leaf number determined by a Student T-test ( $p$ -value $<0.01$ ). Error bars indicate s.d.m.

**Fig. 4. PEP2 regulates *AaFUL*, *AaTFL1*, *AaLFY* and *AaAP1* expression during vernalization.**

Relative expression of *PEP1* (A), *AaSOC1* (B), *AaFUL* (C), *AaTFL1* (D), *AaLFY* (E) and *AaAP1* (F). Three-week-old wild type (WT), *pep1-1* and *pep2-1* shoot apices were harvested before and

during 12 weeks of vernalization. Letters stand for significant differences between WT, *pep1-1* and *pep2-1* at each time point determined by multiple pairwise comparisons using Benjamini-Hochberg-corrected p-values ( $\alpha$ -value of 0.05). Graphs with no letters show no significant differences. Error bars indicate s.d.m.

**Fig. 5. The *pep2* mutant plants flower earlier than the wild type and show reduced reverted phenotypes.** (A) Wild type (WT) plants exposed to several durations of vernalization (8, 12, 18 and 21 weeks) followed by 3 weeks in LDs. (B) *pep2-1* mutant plants exposed to several durations of vernalization (8, 12, 18 and 21 weeks) followed by 3 weeks in LDs. Bar = 10cm. (C) Time to flower emergence of WT and *pep2-1* plants exposed to different durations of vernalization measured as the number of days to the first open flower. (D) Percentage of flowering inflorescence branches (FB) in the WT and the *pep2-1* mutant exposed to 8, 12, 18, and 21 weeks of vernalization at the time the last flower in the inflorescence opened. (E) WT reverted inflorescence in plants vernalized for 8 weeks. (F) *pep2-1* mutant inflorescence in plants vernalized for 8 weeks. Bar = 2cm. (G) Number of bracts within the inflorescence of the WT and the *pep2-1* mutant exposed to 8, 12, 18 and 21 weeks of vernalization at the time the last flower in the inflorescence opened. This experiment was performed together with the *pep1-1* mutant in an experiment previously published (Figure 6 in Lazaro et al., 2018). Data for the WT control is similar between the two papers. Asterisks stand for significant differences between the wild type and the *pep2-1* mutant at each time point determined by multiple pairwise Bonferroni tests ( $\alpha$ -value of 0.05). Error bars indicate s.d.m.

**Fig. 6. *PEP2* is required to activate *PEP1* expression after vernalization.** Relative expression of *PEP1* in the shoot apical meristem and in the vegetative axillary meristems of the wild type (WT) and the *pep2-1* mutant before, during and after 12 weeks of vernalization. Asterisks stand for significant differences between the WT and *pep2-1* at each time point determined by multiple pairwise comparisons using Benjamini-Hochberg-corrected p-values ( $\alpha$ -value of 0.05). Detailed information on significant differences can be found in Table S3. Error bars indicate s.d.m.

**Fig. S1. GO enriched categories in RNAseq experiment.** Bubble network shows GO terms enriched among differentially expressed genes in *pep2-1*. Color represents p value, and size of the bubble represents the representation factor. Hypergeometric test Benjamini–Hochberg FDR correction. Cutoff 0.05. **(A)** Up regulated in *pep2-1* compared to the wild type (WT). **(B)** Up regulated in *pep2-1* compared to *pep1-1*. **(C)** Down regulated in *pep2-1* compared to the WT. **(D)** Down-regulated in *pep2-1* compared to *pep1-1*.

**Fig. S2. AP2 does not affect FLC expression in Arabidopsis.** **(A)** Flowering time of *FRI* and *FRI ap2-7* plants scored as the number of leaves at flowering. Dark grey color represents rosette leaves and light grey color cauline leaves. The asterisk stands for a significant difference in the total leaf number determined by a Student T-test ( $p$ -value $<0.01$ ). **(B)** Relative expression of *FLC* in the shoot apical meristem of *FRI* and *FRI ap2-7* plants before, during and after 40 days of vernalization. There are no significant differences between *FRI* and *FRI ap2-7* samples at each time point determined by multiple pairwise comparisons using Benjamini-Hochberg-corrected  $p$ -values ( $\alpha$ -value of 0.05). Detailed information on significant differences can be found in Table S2. Error bars indicate s.d.m.

**Fig. S3. The expression level of miR156, AaSPL5 and AaSPL15 does not differ between wild type and pep2-1 plants growing in long days.** Relative expression of miR156 **(A)**, *AaSPL5* **(B)**, *AaSPL9* **(C)** and *AaSPL15* **(D)** in wild type (WT) and the *pep2-1* mutant. Apices were harvested from WT and *pep2-1* seedlings growing for 3, 4 and 6 weeks in LDs. Asterisks stand for significant differences between WT and *pep2-1* at each time point determined by multiple pairwise comparisons using Benjamini-Hochberg-corrected  $p$ -values ( $\alpha$ -value of 0.05). Values are the average of 2 biological replicates, error bars indicate s.d.m.

**Fig. S4. PEP2 regulates the age-dependent response of A. alpina to vernalization.** Flowering time demonstrated as the number of days to flower emergence of 3-week-old wild type (WT), *pep1-1* mutant and *pep2-1* mutant, vernalized for 12 weeks. WT did not flower (NF). Error bars indicate s.d.m.

**Fig. S5. *PEP2* regulates *AaFUL*, *AaTFL1*, *AaLFY* and *AaAP1* expression during vernalization in adult plants.** Relative expression of *AaFUL* (A), *AaLFY* (B), *AaAP1* (C). 6-week-old wild type (WT) and *pep2-1* shoot apices were harvested before and during 12 weeks of vernalization. Asterisks stand for significant differences between the WT and *pep2-1* at each time point determined by multiple pairwise comparisons using Benjamini-Hochberg-corrected p-values ( $\alpha$ -value of 0.05). Error bars indicate s.d.m.

**Table S1.** Primers used for PIPE-cloning of the *PEP2* locus

**Table S2.** Statistical differences in Figure S2 determined by multiple pairwise comparisons using Benjamini-Hochberg-corrected p-values comparing *FLC* mRNA levels between *FRI* and *FRI ap2-7* at different developmental stages. The comparisons highlighted in yellow are significantly different ( $\alpha$ -value of 0.05).

**Table S3.** Statistical differences in Figure 6 determined by multiple pairwise comparisons using Benjamini-Hochberg-corrected p-values comparing *PEP1* mRNA levels between *pep2-1* and the wild type at different developmental stages. The comparisons highlighted in yellow are significantly different ( $\alpha$ -value of 0.05).

**A**

bioRxiv preprint doi: <https://doi.org/10.1101/470567>; this version posted November 14, 2018. The copyright holder for this preprint (which was not certified by peer review) is the author/funder, who has granted bioRxiv a license to display the preprint in perpetuity. It is made available under aCC-BY-ND 4.0 International license.

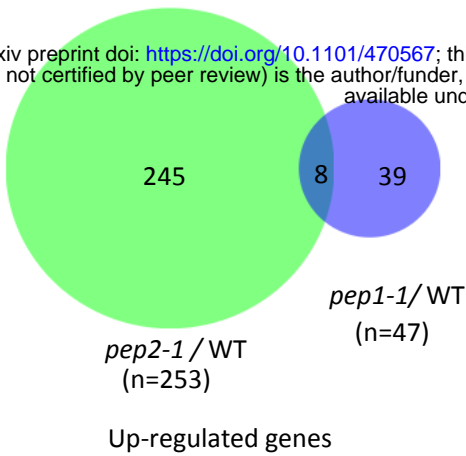**B**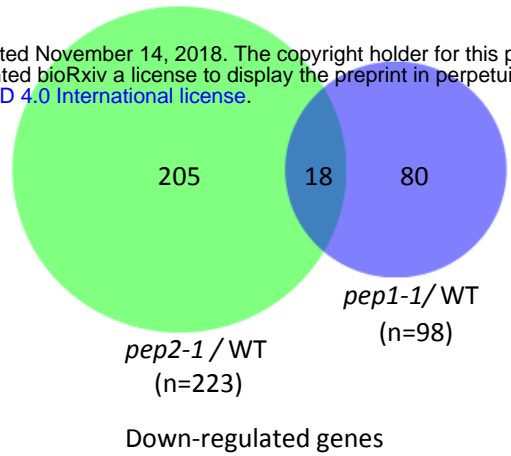**C**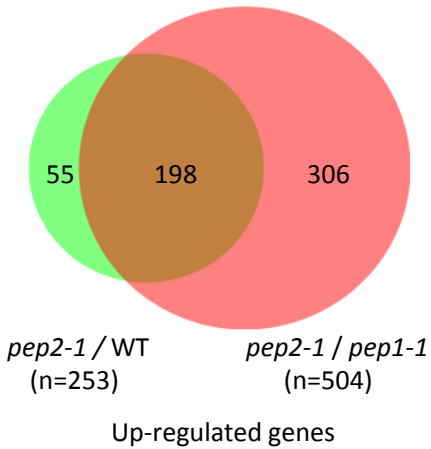**D**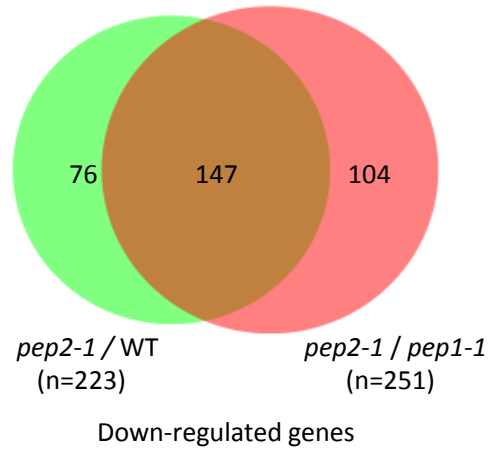**E**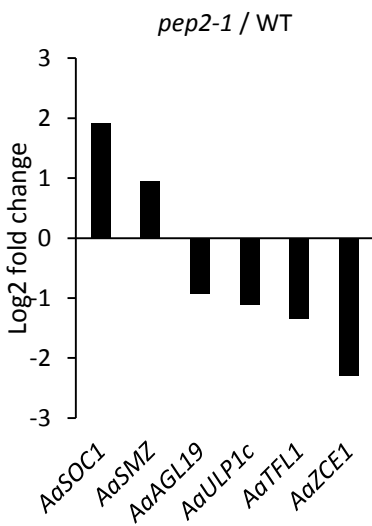**F**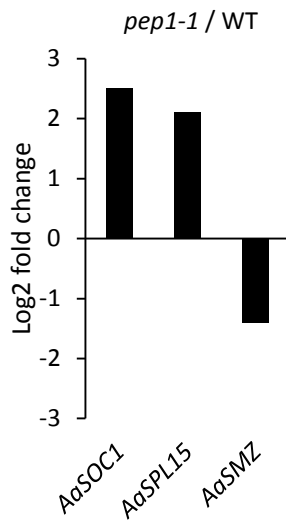**G**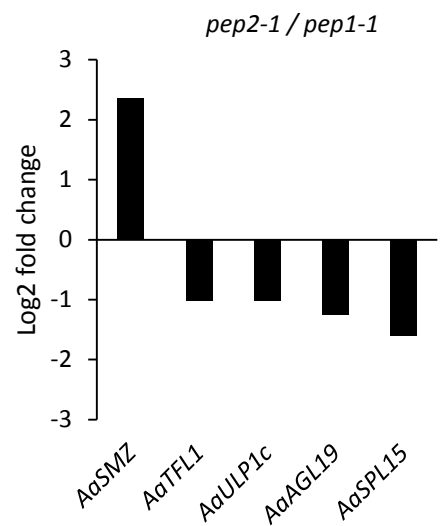

**Fig. 1. Differentially expressed genes in *pep2* and *pep1 A. alpina* mutants. (A and B)** Venn diagram of significantly up-regulated (A) and down-regulated (B) genes in *pep2-1* compared to the wild type (WT) and *pep1-1* compared to the WT. (C and D) Venn diagram of significantly up-regulated (C) and down-regulated (D) genes in *pep2-1* compared to the WT and in *pep2-1* compared to *pep1-1*. (E-G) Flowering time genes differentially expressed in *pep2-1* compared to the WT (E), *pep1-1* compared to the WT (F) and *pep2-1* compared to *pep1-1* (G). Expression values are based on RNA-sequencing.



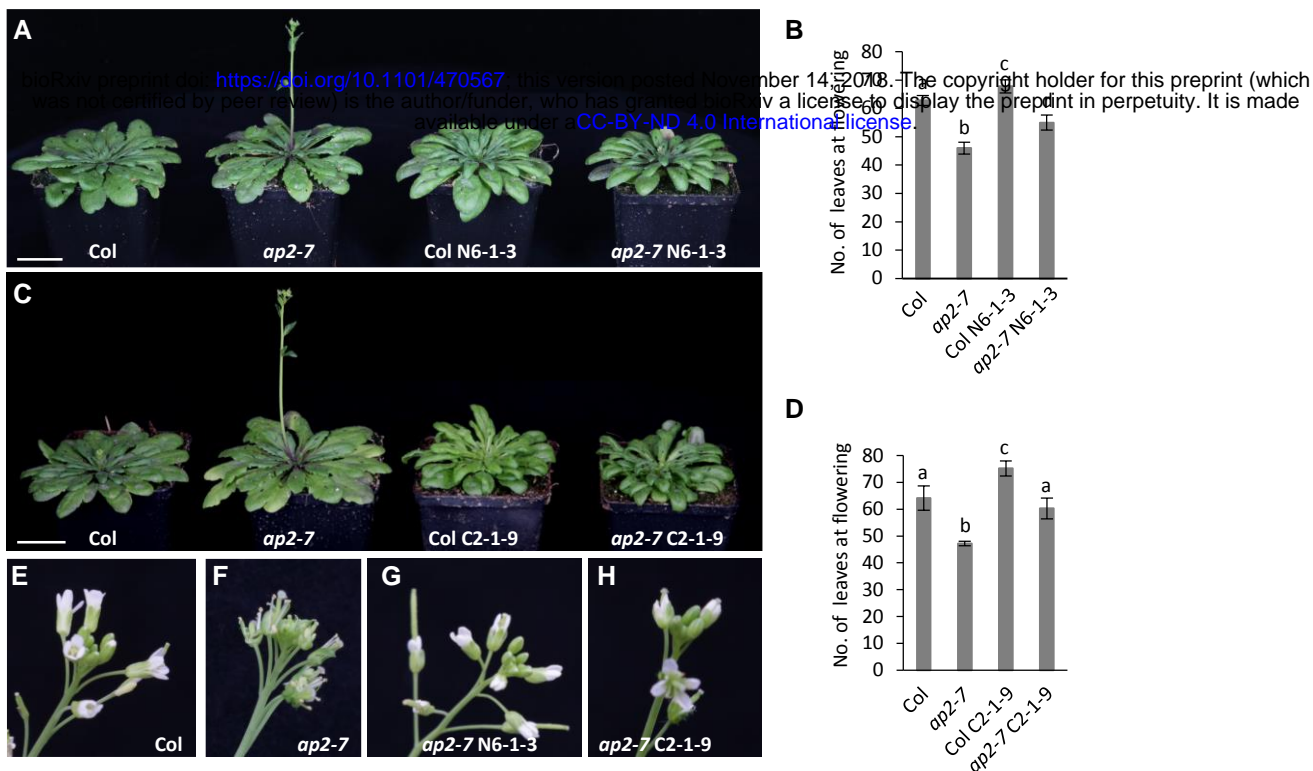

**Fig. 2. *PEP2* can complement the flowering and floral phenotype of the *Arabidopsis ap2-7* mutant. (A and B)** Phenotypes of Col wild type, the *ap2-7* mutant, the Col *ProPEP2::VENUS::PEP2* N6-1-3 and the *ap2-7 ProPEP2::VENUS::PEP2* N6-1-3 lines grown in SDs (A) and number of leaves at flowering (B). **(C and D)** Col, the *ap2-7* mutant, the Col *ProPEP2::PEP2::VENUS* C2-1-9 and the *ap2-7 ProPEP2::PEP2::VENUS* C2-1-9 lines grown in SDs (C) and number of leaves at flowering (D). (A and C) Whole plant pictures were taken 57DAG. Bar = 3cm. In B and D asterisks stand for significant differences determined by a Student T-test (p-value<0.01). Error bars indicate s.d.m. **(E to H)** Inflorescence of Col wild type (E) *ap2-7* (F), *ap2-7 ProPEP2::VENUS::PEP2* N6-1-3 (G) and *ap2-7 ProPEP2::PEP2::VENUS* C2-1-9 (H) taken 73DAG in SDs.

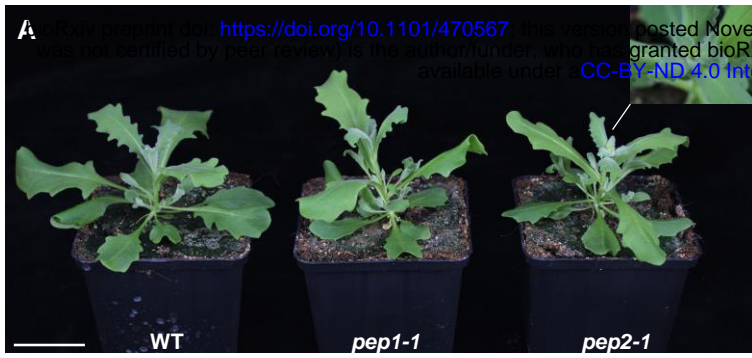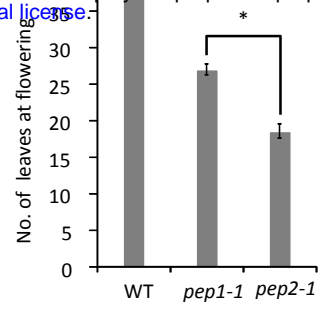

**Fig. 3. *PEP2* regulates the age-dependent response of *A. alpina* to vernalization. (A)** Picture of 3-week-old wild type (WT), *pep1-1* and *pep2-1* vernalized for 12 weeks followed by 2 weeks in LDs. Bar = 5cm. **(B)** Flowering time demonstrated as the number of leaves at flowering of 3-week-old WT, *pep1-1* and *pep2-1* mutants vernalized for 12 weeks. The WT did not flower (NF). The asterisk stands for a significant difference in the total leaf number determined by a Student T-test ( $p$ -value $<0.01$ ). Error bars indicate s.d.m.

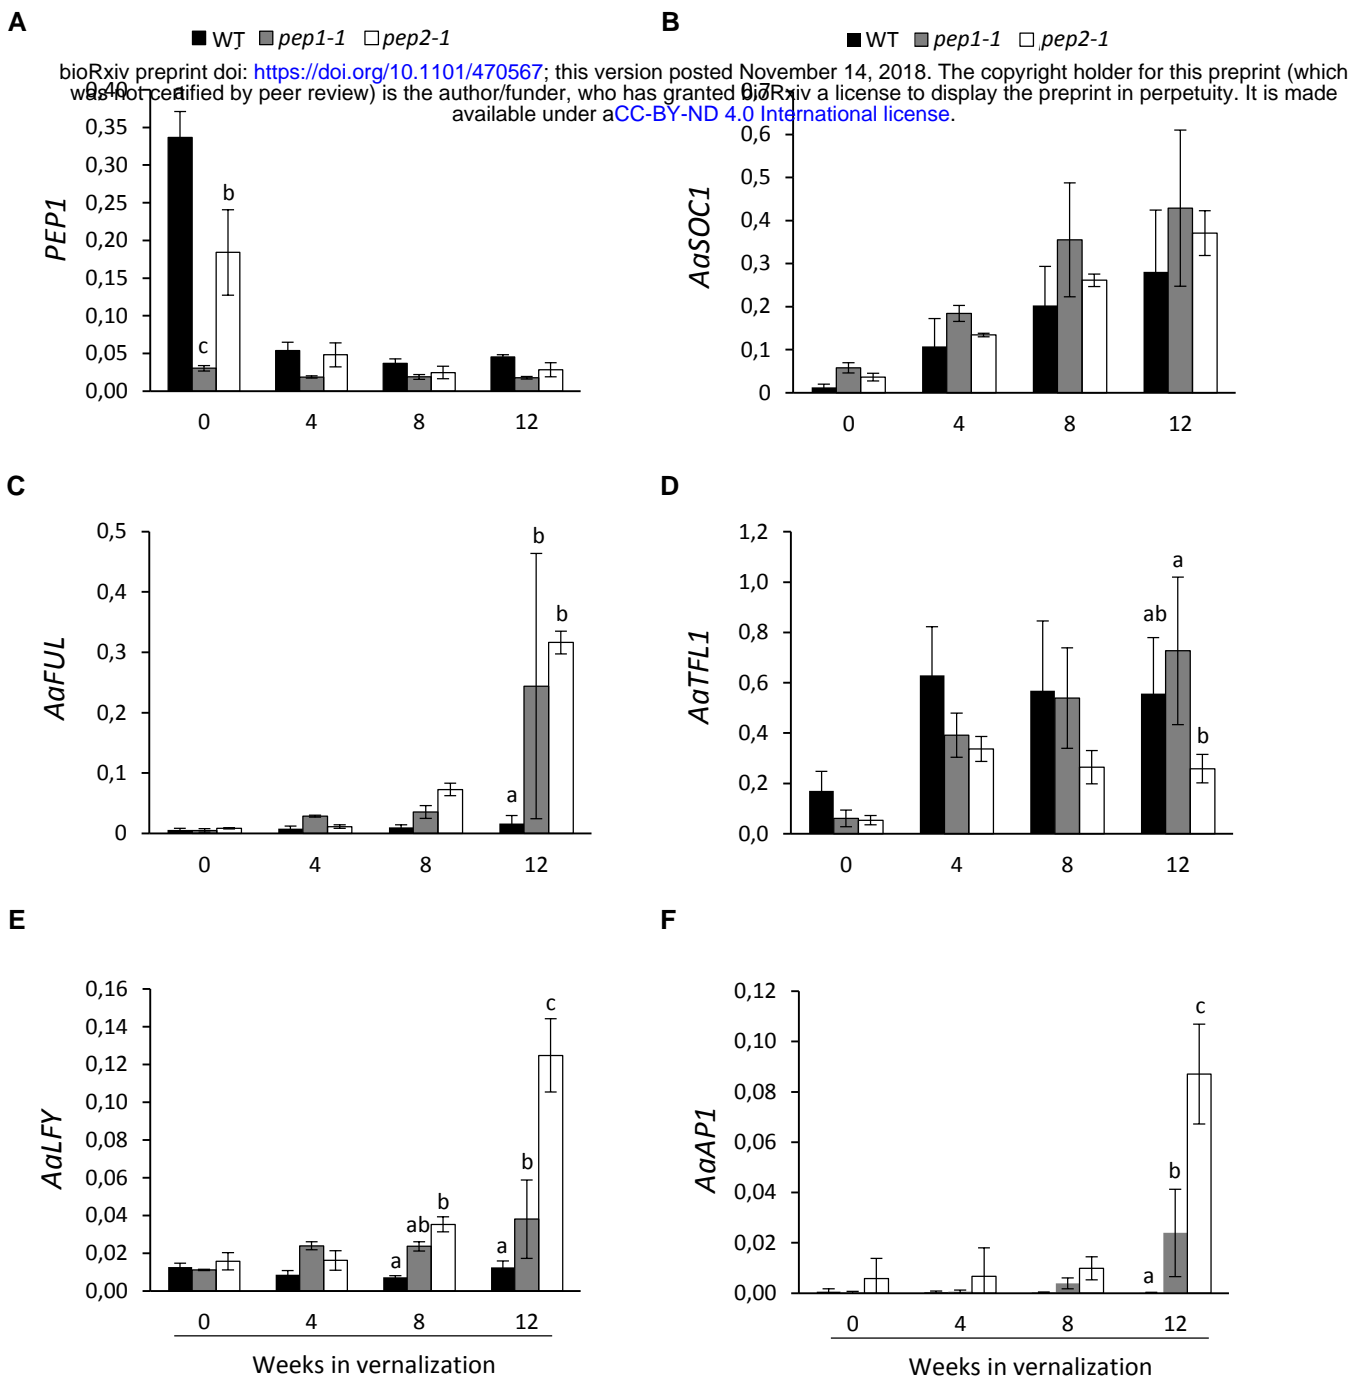

**Fig. 4. PEP2 regulates *AaFUL*, *AaTFL1*, *AaLFY* and *AaAP1* expression during vernalization.** Relative expression of *PEP1* (A), *AaSOC1* (B), *AaFUL* (C), *AaTFL1* (D), *AaLFY* (E) and *AaAP1* (F). Three-week-old wild type (WT), *pep1-1* and *pep2-1* shoot apices were harvested before and during 12 weeks of vernalization. Letters stand for significant differences between WT, *pep1-1* and *pep2-1* at each time point determined by multiple pairwise comparisons using Benjamini-Hochberg-corrected p-values ( $\alpha$ -value of 0.05). Graphs with no letters show no significant differences. Error bars indicate s.d.m.

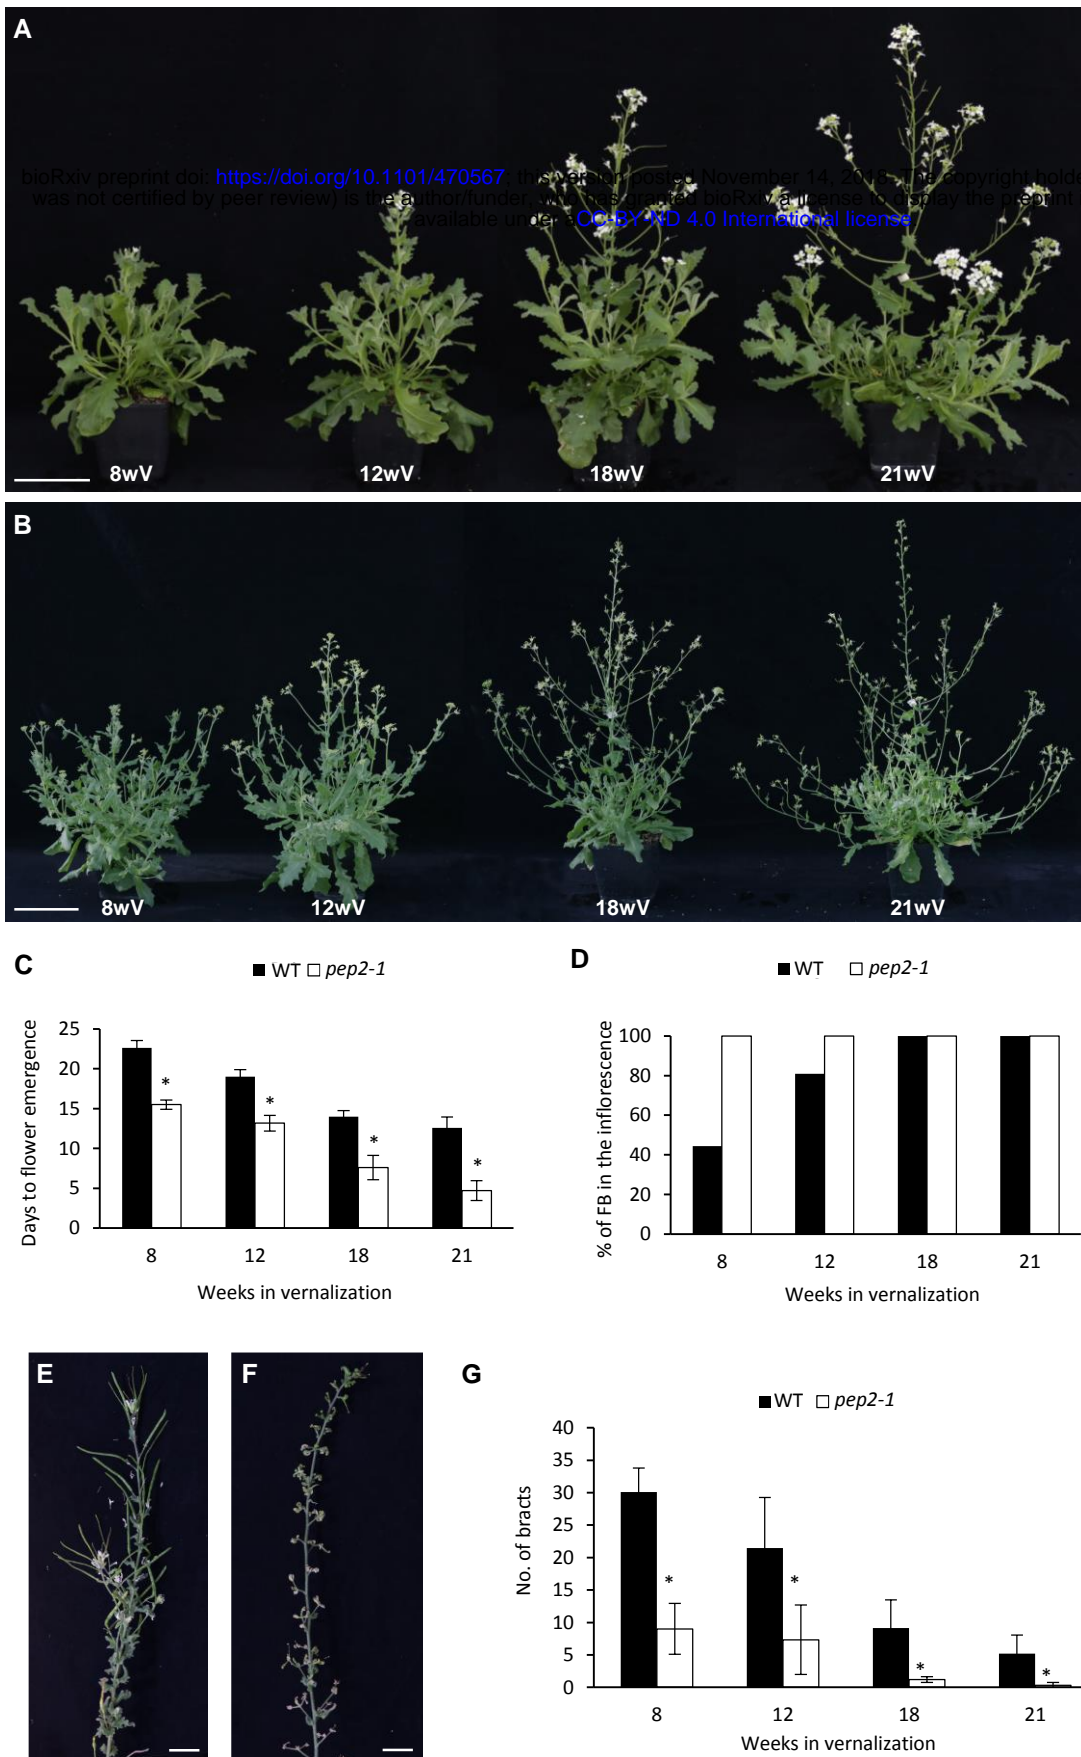

**Fig. 5. The *pep2* mutant plants flower earlier than the wild type and show reduced reverted phenotypes. (A)** Wild type (WT) plants exposed to several durations of vernalization (8, 12, 18 and 21 weeks) followed by 3 weeks in LDs. **(B)** *pep2-1* mutant plants exposed to several durations of vernalization (8, 12, 18 and 21 weeks) followed by 3 weeks in LDs. Bar = 10cm. **(C)** Time to flower emergence of WT and *pep2-1* plants exposed to different durations of vernalization measured as the number of days to the first open flower. **(D)** Percentage of flowering inflorescence branches (FB) in the WT and the *pep2-1* mutant exposed to 8, 12, 18, and 21 weeks of vernalization at the time the last flower in the inflorescence opened. **(E)** WT reverted inflorescence in plants vernalized for 8 weeks. **(F)** *pep2-1* mutant inflorescence in plants vernalized for 8 weeks. Bar = 2cm. **(G)** Number of bracts within the inflorescence of the WT and the *pep2-1* mutant exposed to 8, 12, 18 and 21 weeks of vernalization at the time the last flower in the inflorescence opened. This experiment was performed together with the *pep1-1* mutant in an experiment previously published (Figure 6 in Lazaro et al., 2018). Data for the WT control is similar between the two papers. Asterisks stand for significant differences between the wild type and the *pep2-1* mutant at each time point determined by multiple pairwise Bonferroni tests ( $\alpha$ -value of 0.05). Error bars indicate s.d.m.

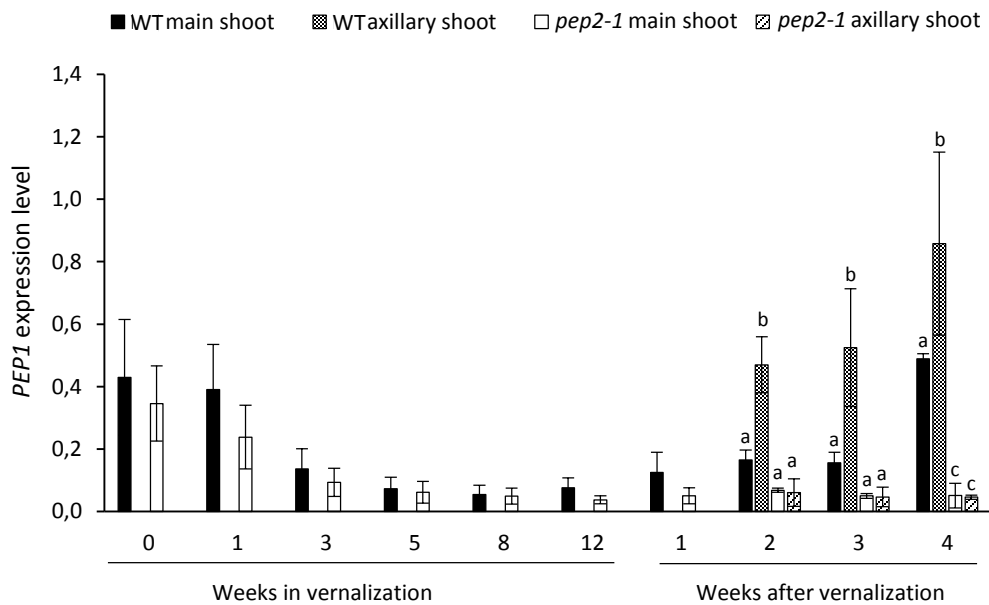

**Fig. 6. *PEP2* is required to activate *PEP1* expression after vernalization.** Relative expression of *PEP1* in the shoot apical meristem and in the vegetative axillary meristems of the wild type (WT) and the *pep2-1* mutant before, during and after 12 weeks of vernalization. Asterisks stand for significant differences between the WT and *pep2-1* at each time point determined by multiple pairwise comparisons using Benjamini-Hochberg-corrected p-values ( $\alpha$ -value of 0.05). Detailed information on significant differences can be found in Table S3. Error bars indicate s.d.m.
